# Supplementary material
Source: publisher site journal article supplement (https://www.dovepress.com/article/586702)
Supplement: Supplementary file 1 [file 586702%20Revised%20Supplementary%20Material.docx]

**Supplementary Materials**

**Supplementary Methods**

**Detailed Sample Collection Procedures**

NPS were obtained using flexible synthetic fiber shafts, inserted horizontally through the nostril until resistance was encountered at the nasopharynx (depth ≈5–8 cm), rotated for 10-15 seconds to absorb secretions, immediately placed in 1.5 mL viral transport media, and stored vertically. BALF was collected during fiberoptic bronchoscopy by instilling three 10-45 mL aliquots of sterile 0.9% saline into subsegmental bronchi followed by gentle aspiration into sterile Lukens traps, ensuring ≥5 mL return volume. Spontaneously expectorated sputum samples were obtained through deep cough maneuvers into sterile screw-cap containers, prioritizing morning specimens with <10% salivary contamination verified visually. Prior to nucleic acid extraction, samples were vortexed for homogenization (swabs vigorously pressed against tube walls).

**Supplementary Tables**

Supplementary Table 1. tNGS findings in patients with Human Metapneumovirus infection stratified by age

| Variables | Total (n = 526) | Infant (n = 110) | Toddler (n = 146) | Preschool (n = 195) | School Age (n = 71) | Adolescent (n = 4) | Statistic | P-values |
| --- | --- | --- | --- | --- | --- | --- | --- | --- |
| Cytomegalovirus class, n(%) | 38 (7.22) | 25 (22.73) | 9 (6.16) | 4 (2.05) | 0 (0.00) | 0 (0.00) | χ²=53.32 | <.001 |
| Fusobacterium nucleatum class, n(%) | 135 (25.67) | 3 (2.73) | 35 (23.97) | 68 (34.87) | 27 (38.03) | 2 (50.00) | χ²=46.15 | <.001 |
| Klebsiella pneumoniae class, n(%) | 24 (4.56) | 10 (9.09) | 5 (3.42) | 2 (1.03) | 6 (8.45) | 1 (25.00) | - | <.001 |
| Streptococcus intermedius class, n(%) | 39 (7.41) | 0 (0.00) | 7 (4.79) | 26 (13.33) | 6 (8.45) | 0 (0.00) | χ²=20.65 | <.001 |
| Streptococcus pneumoniae class, n(%) | 151 (28.71) | 18 (16.36) | 29 (19.86) | 82 (42.05) | 22 (30.99) | 0 (0.00) | χ²=32.53 | <.001 |
| Pneumocystis jirovecii class, n(%) | 8 (1.52) | 7 (6.36) | 1 (0.68) | 0 (0.00) | 0 (0.00) | 0 (0.00) | - | 0.001 |
| Klebsiella oxytoca class, n(%) | 2 (0.38) | 1 (0.91) | 0 (0.00) | 0 (0.00) | 0 (0.00) | 1 (25.00) | - | 0.005 |
| EBV class, n(%) | 39 (7.41) | 0 (0.00) | 10 (6.85) | 21 (10.77) | 8 (11.27) | 0 (0.00) | χ²=13.93 | 0.008 |
| Human adenovirus 7 class, n(%) | 1 (0.19) | 0 (0.00) | 0 (0.00) | 0 (0.00) | 0 (0.00) | 1 (25.00) | - | 0.008 |
| Legionella pneumophila class, n(%) | 3 (0.57) | 0 (0.00) | 0 (0.00) | 0 (0.00) | 3 (4.23) | 0 (0.00) | - | 0.011 |
| Human herpesvirus 7 class, n(%) | 12 (2.28) | 0 (0.00) | 2 (1.37) | 5 (2.56) | 4 (5.63) | 1 (25.00) | - | 0.013 |
| Mycoplasma pneumoniae class, n(%) | 68 (12.93) | 6 (5.45) | 21 (14.38) | 24 (12.31) | 16 (22.54) | 1 (25.00) | χ²=12.14 | 0.016 |
| Influenza C virus class, n(%) | 2 (0.38) | 0 (0.00) | 0 (0.00) | 0 (0.00) | 2 (2.82) | 0 (0.00) | - | 0.033 |
| Bordetella pertussis class, n(%) | 14 (2.66) | 7 (6.36) | 4 (2.74) | 1 (0.51) | 2 (2.82) | 0 (0.00) | - | 0.034 |
| Human bocavirus 1 class, n(%) | 14 (2.66) | 1 (0.91) | 9 (6.16) | 2 (1.03) | 2 (2.82) | 0 (0.00) | - | 0.041 |
| Rhinovirus C class, n(%) | 23 (4.37) | 8 (7.27) | 1 (0.68) | 11 (5.64) | 3 (4.23) | 0 (0.00) | - | 0.047 |
| Rhinovirus B class, n(%) | 9 (1.71) | 2 (1.82) | 0 (0.00) | 3 (1.54) | 4 (5.63) | 0 (0.00) | - | 0.054 |
| Human herpesvirus 5 class, n(%) | 7 (1.33) | 5 (4.55) | 1 (0.68) | 1 (0.51) | 0 (0.00) | 0 (0.00) | - | 0.058 |
| Moraxella catarrhalis class, n(%) | 94 (17.87) | 23 (20.91) | 20 (13.70) | 43 (22.05) | 8 (11.27) | 0 (0.00) | χ²=7.72 | 0.102 |
| HSV1 class, n(%) | 9 (1.71) | 0 (0.00) | 4 (2.74) | 2 (1.03) | 3 (4.23) | 0 (0.00) | - | 0.142 |
| Acinetobacter calcoaceticus baumannii complex class, n(%) | 1 (0.19) | 0 (0.00) | 0 (0.00) | 0 (0.00) | 1 (1.41) | 0 (0.00) | - | 0.143 |
| Human adenovirus 57 class, n(%) | 1 (0.19) | 0 (0.00) | 0 (0.00) | 0 (0.00) | 1 (1.41) | 0 (0.00) | - | 0.143 |
| MRSA class, n(%) | 1 (0.19) | 0 (0.00) | 0 (0.00) | 0 (0.00) | 1 (1.41) | 0 (0.00) | - | 0.143 |
| Streptococcus agalactiae class, n(%) | 1 (0.19) | 0 (0.00) | 0 (0.00) | 0 (0.00) | 1 (1.41) | 0 (0.00) | - | 0.143 |
| Pseudomonas aeruginosa class, n(%) | 6 (1.14) | 2 (1.82) | 3 (2.05) | 0 (0.00) | 1 (1.41) | 0 (0.00) | - | 0.162 |
| Human herpesvirus 6B class, n(%) | 5 (0.95) | 0 (0.00) | 0 (0.00) | 4 (2.05) | 1 (1.41) | 0 (0.00) | - | 0.201 |
| Streptococcus anginosus group class, n(%) | 11 (2.09) | 0 (0.00) | 2 (1.37) | 7 (3.59) | 2 (2.82) | 0 (0.00) | - | 0.206 |
| Human adenovirus B class, n(%) | 2 (0.38) | 0 (0.00) | 1 (0.68) | 0 (0.00) | 1 (1.41) | 0 (0.00) | - | 0.208 |
| Klebsiella aerogenes class, n(%) | 4 (0.76) | 1 (0.91) | 2 (1.37) | 0 (0.00) | 1 (1.41) | 0 (0.00) | - | 0.268 |
| WU polyomavirus class, n(%) | 4 (0.76) | 1 (0.91) | 2 (1.37) | 0 (0.00) | 1 (1.41) | 0 (0.00) | - | 0.268 |
| SARS CoV 2 class, n(%) | 3 (0.57) | 1 (0.91) | 2 (1.37) | 0 (0.00) | 0 (0.00) | 0 (0.00) | - | 0.282 |
| Macrolide antibiotics class, n(%) | 37 (7.03) | 4 (3.64) | 9 (6.16) | 16 (8.21) | 8 (11.27) | 0 (0.00) | - | 0.310 |
| Escherichia coli class, n(%) | 8 (1.52) | 4 (3.64) | 1 (0.68) | 2 (1.03) | 1 (1.41) | 0 (0.00) | - | 0.321 |
| Rhinovirus class, n(%) | 4 (0.76) | 0 (0.00) | 0 (0.00) | 3 (1.54) | 1 (1.41) | 0 (0.00) | - | 0.322 |
| Candida albicans class, n(%) | 41 (7.79) | 8 (7.27) | 10 (6.85) | 13 (6.67) | 9 (12.68) | 1 (25.00) | χ²=4.57 | 0.334 |
| Bordetella parapertussis class, n(%) | 1 (0.19) | 1 (0.91) | 0 (0.00) | 0 (0.00) | 0 (0.00) | 0 (0.00) | - | 0.352 |
| Burkholderia cepacia complex class, n(%) | 1 (0.19) | 1 (0.91) | 0 (0.00) | 0 (0.00) | 0 (0.00) | 0 (0.00) | - | 0.352 |
| Measles virus class, n(%) | 1 (0.19) | 1 (0.91) | 0 (0.00) | 0 (0.00) | 0 (0.00) | 0 (0.00) | - | 0.352 |
| Stenotrophomonas maltophilia class, n(%) | 1 (0.19) | 1 (0.91) | 0 (0.00) | 0 (0.00) | 0 (0.00) | 0 (0.00) | - | 0.352 |
| Ureaplasma parvum class, n(%) | 1 (0.19) | 1 (0.91) | 0 (0.00) | 0 (0.00) | 0 (0.00) | 0 (0.00) | - | 0.352 |
| Human parainfluenza virus 3 class, n(%) | 18 (3.42) | 6 (5.45) | 4 (2.74) | 4 (2.05) | 4 (5.63) | 0 (0.00) | - | 0.359 |
| Human adenovirus 5 class, n(%) | 2 (0.38) | 0 (0.00) | 0 (0.00) | 1 (0.51) | 1 (1.41) | 0 (0.00) | - | 0.385 |
| Human coronavirus OC43 class, n(%) | 2 (0.38) | 0 (0.00) | 0 (0.00) | 1 (0.51) | 1 (1.41) | 0 (0.00) | - | 0.385 |
| Streptococcus pyogenes class, n(%) | 2 (0.38) | 0 (0.00) | 0 (0.00) | 1 (0.51) | 1 (1.41) | 0 (0.00) | - | 0.385 |
| Acinetobacter baumannii class, n(%) | 22 (4.18) | 8 (7.27) | 6 (4.11) | 7 (3.59) | 1 (1.41) | 0 (0.00) | - | 0.393 |
| Candida parapsilosis class, n(%) | 9 (1.71) | 4 (3.64) | 2 (1.37) | 3 (1.54) | 0 (0.00) | 0 (0.00) | - | 0.422 |
| Haemophilus influenzae class, n(%) | 221 (42.02) | 46 (41.82) | 67 (45.89) | 83 (42.56) | 24 (33.80) | 1 (25.00) | χ²=3.37 | 0.498 |
| Streptococcus mitis group class, n(%) | 40 (7.60) | 11 (10.00) | 13 (8.90) | 10 (5.13) | 6 (8.45) | 0 (0.00) | χ²=3.35 | 0.501 |
| Staphylococcus aureus class, n(%) | 59 (11.22) | 15 (13.64) | 14 (9.59) | 19 (9.74) | 11 (15.49) | 0 (0.00) | χ²=3.27 | 0.514 |
| Influenza B Victoria class, n(%) | 5 (0.95) | 2 (1.82) | 1 (0.68) | 1 (0.51) | 1 (1.41) | 0 (0.00) | - | 0.551 |
| Candida tropicalis class, n(%) | 12 (2.28) | 3 (2.73) | 3 (2.05) | 3 (1.54) | 3 (4.23) | 0 (0.00) | - | 0.586 |
| Coxsackievirus A16 class, n(%) | 1 (0.19) | 0 (0.00) | 1 (0.68) | 0 (0.00) | 0 (0.00) | 0 (0.00) | - | 0.629 |
| Influenza A H1N1 2009 class, n(%) | 1 (0.19) | 0 (0.00) | 1 (0.68) | 0 (0.00) | 0 (0.00) | 0 (0.00) | - | 0.629 |
| Human adenovirus C class, n(%) | 3 (0.57) | 0 (0.00) | 2 (1.37) | 1 (0.51) | 0 (0.00) | 0 (0.00) | - | 0.669 |
| Tropheryma whipplei class, n(%) | 10 (1.90) | 2 (1.82) | 3 (2.05) | 5 (2.56) | 0 (0.00) | 0 (0.00) | - | 0.752 |
| Rhinovirus A class, n(%) | 42 (7.98) | 7 (6.36) | 13 (8.90) | 18 (9.23) | 4 (5.63) | 0 (0.00) | χ²=1.85 | 0.762 |
| Human RSV A class, n(%) | 6 (1.14) | 2 (1.82) | 1 (0.68) | 2 (1.03) | 1 (1.41) | 0 (0.00) | - | 0.805 |
| Human coronavirus HKU1 class, n(%) | 4 (0.76) | 1 (0.91) | 1 (0.68) | 1 (0.51) | 1 (1.41) | 0 (0.00) | - | 0.832 |
| Human RSV B class, n(%) | 9 (1.71) | 2 (1.82) | 3 (2.05) | 4 (2.05) | 0 (0.00) | 0 (0.00) | - | 0.832 |
| MRSA resistance gene class, n(%) | 3 (0.57) | 0 (0.00) | 1 (0.68) | 2 (1.03) | 0 (0.00) | 0 (0.00) | - | 0.870 |
| Human herpesvirus 6 class, n(%) | 4 (0.76) | 1 (0.91) | 2 (1.37) | 1 (0.51) | 0 (0.00) | 0 (0.00) | - | 0.904 |
| Human parainfluenza virus 1 class, n(%) | 4 (0.76) | 1 (0.91) | 2 (1.37) | 1 (0.51) | 0 (0.00) | 0 (0.00) | - | 0.904 |
| Candida krusei class, n(%) | 2 (0.38) | 0 (0.00) | 1 (0.68) | 1 (0.51) | 0 (0.00) | 0 (0.00) | - | 1.000 |
| Coxsackievirus A10 class, n(%) | 2 (0.38) | 0 (0.00) | 1 (0.68) | 1 (0.51) | 0 (0.00) | 0 (0.00) | - | 1.000 |
| Coxsackievirus A6 class, n(%) | 1 (0.19) | 0 (0.00) | 0 (0.00) | 1 (0.51) | 0 (0.00) | 0 (0.00) | - | 1.000 |
| Enterococcus faecium class, n(%) | 1 (0.19) | 0 (0.00) | 0 (0.00) | 1 (0.51) | 0 (0.00) | 0 (0.00) | - | 1.000 |
| Enterovirus A class, n(%) | 2 (0.38) | 0 (0.00) | 1 (0.68) | 1 (0.51) | 0 (0.00) | 0 (0.00) | - | 1.000 |
| Enterovirus B class, n(%) | 1 (0.19) | 0 (0.00) | 0 (0.00) | 1 (0.51) | 0 (0.00) | 0 (0.00) | - | 1.000 |
| Enterovirus D68 class, n(%) | 2 (0.38) | 0 (0.00) | 1 (0.68) | 1 (0.51) | 0 (0.00) | 0 (0.00) | - | 1.000 |
| Haemophilus haemolyticus class, n(%) | 3 (0.57) | 1 (0.91) | 1 (0.68) | 1 (0.51) | 0 (0.00) | 0 (0.00) | - | 1.000 |
| Human adenovirus 2 class, n(%) | 1 (0.19) | 0 (0.00) | 0 (0.00) | 1 (0.51) | 0 (0.00) | 0 (0.00) | - | 1.000 |
| Human adenovirus 3 class, n(%) | 6 (1.14) | 1 (0.91) | 2 (1.37) | 2 (1.03) | 1 (1.41) | 0 (0.00) | - | 1.000 |
| Human coronavirus 229E class, n(%) | 1 (0.19) | 0 (0.00) | 0 (0.00) | 1 (0.51) | 0 (0.00) | 0 (0.00) | - | 1.000 |
| Human herpesvirus 4 class, n(%) | 2 (0.38) | 0 (0.00) | 1 (0.68) | 1 (0.51) | 0 (0.00) | 0 (0.00) | - | 1.000 |
| Influenza A H3N2 class, n(%) | 1 (0.19) | 0 (0.00) | 0 (0.00) | 1 (0.51) | 0 (0.00) | 0 (0.00) | - | 1.000 |
| Klebsiella variicola class, n(%) | 1 (0.19) | 0 (0.00) | 0 (0.00) | 1 (0.51) | 0 (0.00) | 0 (0.00) | - | 1.000 |
| Neisseria meningitidis class, n(%) | 1 (0.19) | 0 (0.00) | 0 (0.00) | 1 (0.51) | 0 (0.00) | 0 (0.00) | - | 1.000 |
| Parvimonas micra class, n(%) | 2 (0.38) | 0 (0.00) | 1 (0.68) | 1 (0.51) | 0 (0.00) | 0 (0.00) | - | 1.000 |
| Varicella zoster virus class, n(%) | 1 (0.19) | 0 (0.00) | 0 (0.00) | 1 (0.51) | 0 (0.00) | 0 (0.00) | - | 1.000 |

Note: tNGS, targeted next-generation sequencing; EBV, Epstein-Barr virus; HSV1, Herpes simplex virus type 1; MRSA, Methicillin-resistant Staphylococcus aureus; RSV, Respiratory Syncytial Virus. Infant: <12 months, Toddler: 12-36 months, Preschool: 37-72 months, School-Age: 72-144 months, Adolescent: >144 months. The threshold for statistical significance is P-values < 0.05.

|  |
| --- |

Supplementary Table 2. tNGS findings in patients with Human Metapneumovirus infection stratified by gender

| Variables | Total (n = 526) | Female (n = 216) | Male (n = 310) | Statistic | P-values |
| --- | --- | --- | --- | --- | --- |
| Fusobacterium nucleatum class, n(%) | 135 (25.67) | 68 (31.48) | 67 (21.61) | χ²=6.50 | 0.011 |
| Streptococcus mitis group class, n(%) | 40 (7.60) | 10 (4.63) | 30 (9.68) | χ²=4.62 | 0.032 |
| Human bocavirus 1 class, n(%) | 14 (2.66) | 9 (4.17) | 5 (1.61) | χ²=3.20 | 0.073 |
| EBV class, n(%) | 39 (7.41) | 11 (5.09) | 28 (9.03) | χ²=2.88 | 0.090 |
| Cytomegalovirus class, n(%) | 38 (7.22) | 11 (5.09) | 27 (8.71) | χ²=2.48 | 0.115 |
| Legionella pneumophila class, n(%) | 3 (0.57) | 3 (1.39) | 0 (0.00) | χ²=2.23 | 0.136 |
| MRSA resistance gene class, n(%) | 3 (0.57) | 3 (1.39) | 0 (0.00) | χ²=2.23 | 0.136 |
| Rhinovirus A class, n(%) | 42 (7.98) | 13 (6.02) | 29 (9.35) | χ²=1.93 | 0.165 |
| Human herpesvirus 4 class, n(%) | 2 (0.38) | 2 (0.93) | 0 (0.00) | - | 0.168 |
| Influenza C virus class, n(%) | 2 (0.38) | 2 (0.93) | 0 (0.00) | - | 0.168 |
| Human parainfluenza virus 3 class, n(%) | 18 (3.42) | 10 (4.63) | 8 (2.58) | χ²=1.62 | 0.203 |
| Human herpesvirus 6 class, n(%) | 4 (0.76) | 0 (0.00) | 4 (1.29) | χ²=1.36 | 0.244 |
| Moraxella catarrhalis class, n(%) | 94 (17.87) | 43 (19.91) | 51 (16.45) | χ²=1.04 | 0.309 |
| Macrolide antibiotics class, n(%) | 37 (7.03) | 18 (8.33) | 19 (6.13) | χ²=0.95 | 0.331 |
| Candida albicans class, n(%) | 41 (7.79) | 14 (6.48) | 27 (8.71) | χ²=0.88 | 0.348 |
| Acinetobacter baumannii class, n(%) | 22 (4.18) | 7 (3.24) | 15 (4.84) | χ²=0.81 | 0.368 |
| Pneumocystis jirovecii class, n(%) | 8 (1.52) | 5 (2.31) | 3 (0.97) | χ²=0.77 | 0.379 |
| Human coronavirus HKU1 class, n(%) | 4 (0.76) | 3 (1.39) | 1 (0.32) | χ²=0.77 | 0.382 |
| Rhinovirus class, n(%) | 4 (0.76) | 3 (1.39) | 1 (0.32) | χ²=0.77 | 0.382 |
| Human adenovirus 2 class, n(%) | 1 (0.19) | 1 (0.46) | 0 (0.00) | - | 0.411 |
| Measles virus class, n(%) | 1 (0.19) | 1 (0.46) | 0 (0.00) | - | 0.411 |
| MRSA class, n(%) | 1 (0.19) | 1 (0.46) | 0 (0.00) | - | 0.411 |
| Streptococcus agalactiae class, n(%) | 1 (0.19) | 1 (0.46) | 0 (0.00) | - | 0.411 |
| Varicella zoster virus class, n(%) | 1 (0.19) | 1 (0.46) | 0 (0.00) | - | 0.411 |
| Bordetella pertussis class, n(%) | 14 (2.66) | 7 (3.24) | 7 (2.26) | χ²=0.47 | 0.491 |
| Human coronavirus OC43 class, n(%) | 2 (0.38) | 0 (0.00) | 2 (0.65) | - | 0.515 |
| Parvimonas micra class, n(%) | 2 (0.38) | 0 (0.00) | 2 (0.65) | - | 0.515 |
| Mycoplasma pneumoniae class, n(%) | 68 (12.93) | 30 (13.89) | 38 (12.26) | χ²=0.30 | 0.583 |
| Influenza B Victoria class, n(%) | 5 (0.95) | 1 (0.46) | 4 (1.29) | χ²=0.26 | 0.613 |
| Klebsiella pneumoniae class, n(%) | 24 (4.56) | 11 (5.09) | 13 (4.19) | χ²=0.24 | 0.627 |
| Human herpesvirus 6B class, n(%) | 5 (0.95) | 3 (1.39) | 2 (0.65) | χ²=0.17 | 0.683 |
| Human herpesvirus 7 class, n(%) | 12 (2.28) | 6 (2.78) | 6 (1.94) | χ²=0.12 | 0.734 |
| Haemophilus haemolyticus class, n(%) | 3 (0.57) | 2 (0.93) | 1 (0.32) | χ²=0.10 | 0.752 |
| Haemophilus influenzae class, n(%) | 221 (42.02) | 89 (41.20) | 132 (42.58) | χ²=0.10 | 0.753 |
| Tropheryma whipplei class, n(%) | 10 (1.90) | 5 (2.31) | 5 (1.61) | χ²=0.07 | 0.798 |
| Candida tropicalis class, n(%) | 12 (2.28) | 4 (1.85) | 8 (2.58) | χ²=0.06 | 0.800 |
| Staphylococcus aureus class, n(%) | 59 (11.22) | 25 (11.57) | 34 (10.97) | χ²=0.05 | 0.828 |
| Streptococcus pneumoniae class, n(%) | 151 (28.71) | 63 (29.17) | 88 (28.39) | χ²=0.04 | 0.846 |
| Rhinovirus C class, n(%) | 23 (4.37) | 9 (4.17) | 14 (4.52) | χ²=0.04 | 0.847 |
| Human parainfluenza virus 1 class, n(%) | 4 (0.76) | 1 (0.46) | 3 (0.97) | χ²=0.02 | 0.884 |
| Rhinovirus B class, n(%) | 9 (1.71) | 3 (1.39) | 6 (1.94) | χ²=0.02 | 0.894 |
| Human adenovirus 3 class, n(%) | 6 (1.14) | 3 (1.39) | 3 (0.97) | χ²=0.00 | 0.976 |
| Streptococcus intermedius class, n(%) | 39 (7.41) | 16 (7.41) | 23 (7.42) | χ²=0.00 | 0.996 |
| Acinetobacter calcoaceticus baumannii complex class, n(%) | 1 (0.19) | 0 (0.00) | 1 (0.32) | - | 1.000 |
| Bordetella parapertussis class, n(%) | 1 (0.19) | 0 (0.00) | 1 (0.32) | - | 1.000 |
| Burkholderia cepacia complex class, n(%) | 1 (0.19) | 0 (0.00) | 1 (0.32) | - | 1.000 |
| Candida krusei class, n(%) | 2 (0.38) | 1 (0.46) | 1 (0.32) | - | 1.000 |
| Candida parapsilosis class, n(%) | 9 (1.71) | 4 (1.85) | 5 (1.61) | χ²=0.00 | 1.000 |
| Coxsackievirus A10 class, n(%) | 2 (0.38) | 1 (0.46) | 1 (0.32) | - | 1.000 |
| Coxsackievirus A16 class, n(%) | 1 (0.19) | 0 (0.00) | 1 (0.32) | - | 1.000 |
| Coxsackievirus A6 class, n(%) | 1 (0.19) | 0 (0.00) | 1 (0.32) | - | 1.000 |
| Enterococcus faecium class, n(%) | 1 (0.19) | 0 (0.00) | 1 (0.32) | - | 1.000 |
| Enterovirus A class, n(%) | 2 (0.38) | 1 (0.46) | 1 (0.32) | - | 1.000 |
| Enterovirus B class, n(%) | 1 (0.19) | 0 (0.00) | 1 (0.32) | - | 1.000 |
| Enterovirus D68 class, n(%) | 2 (0.38) | 1 (0.46) | 1 (0.32) | - | 1.000 |
| Escherichia coli class, n(%) | 8 (1.52) | 3 (1.39) | 5 (1.61) | χ²=0.00 | 1.000 |
| HSV1 class, n(%) | 9 (1.71) | 4 (1.85) | 5 (1.61) | χ²=0.00 | 1.000 |
| Human adenovirus 5 class, n(%) | 2 (0.38) | 1 (0.46) | 1 (0.32) | - | 1.000 |
| Human adenovirus 57 class, n(%) | 1 (0.19) | 0 (0.00) | 1 (0.32) | - | 1.000 |
| Human adenovirus 7 class, n(%) | 1 (0.19) | 0 (0.00) | 1 (0.32) | - | 1.000 |
| Human adenovirus B class, n(%) | 2 (0.38) | 1 (0.46) | 1 (0.32) | - | 1.000 |
| Human adenovirus C class, n(%) | 3 (0.57) | 1 (0.46) | 2 (0.65) | χ²=0.00 | 1.000 |
| Human coronavirus 229E class, n(%) | 1 (0.19) | 0 (0.00) | 1 (0.32) | - | 1.000 |
| Human herpesvirus 5 class, n(%) | 7 (1.33) | 3 (1.39) | 4 (1.29) | χ²=0.00 | 1.000 |
| Human RSV A class, n(%) | 6 (1.14) | 2 (0.93) | 4 (1.29) | χ²=0.00 | 1.000 |
| Human RSV B class, n(%) | 9 (1.71) | 4 (1.85) | 5 (1.61) | χ²=0.00 | 1.000 |
| Influenza A H1N1 2009 class, n(%) | 1 (0.19) | 0 (0.00) | 1 (0.32) | - | 1.000 |
| Influenza A H3N2 class, n(%) | 1 (0.19) | 0 (0.00) | 1 (0.32) | - | 1.000 |
| Klebsiella aerogenes class, n(%) | 4 (0.76) | 2 (0.93) | 2 (0.65) | χ²=0.00 | 1.000 |
| Klebsiella oxytoca class, n(%) | 2 (0.38) | 1 (0.46) | 1 (0.32) | - | 1.000 |
| Klebsiella variicola class, n(%) | 1 (0.19) | 0 (0.00) | 1 (0.32) | - | 1.000 |
| Neisseria meningitidis class, n(%) | 1 (0.19) | 0 (0.00) | 1 (0.32) | - | 1.000 |
| Pseudomonas aeruginosa class, n(%) | 6 (1.14) | 2 (0.93) | 4 (1.29) | χ²=0.00 | 1.000 |
| SARS CoV 2 class, n(%) | 3 (0.57) | 1 (0.46) | 2 (0.65) | χ²=0.00 | 1.000 |
| Stenotrophomonas maltophilia class, n(%) | 1 (0.19) | 0 (0.00) | 1 (0.32) | - | 1.000 |
| Streptococcus anginosus group class, n(%) | 11 (2.09) | 5 (2.31) | 6 (1.94) | χ²=0.00 | 1.000 |
| Streptococcus pyogenes class, n(%) | 2 (0.38) | 1 (0.46) | 1 (0.32) | - | 1.000 |
| Ureaplasma parvum class, n(%) | 1 (0.19) | 0 (0.00) | 1 (0.32) | - | 1.000 |
| WU polyomavirus class, n(%) | 4 (0.76) | 2 (0.93) | 2 (0.65) | χ²=0.00 | 1.000 |

Note: tNGS, targeted next-generation sequencing; EBV, Epstein-Barr virus; HSV1, Herpes simplex virus type 1; MRSA, Methicillin-resistant Staphylococcus aureus; RSV, Respiratory Syncytial Virus. The threshold for statistical significance is P-values < 0.05.

Supplementary Table 3. tNGS findings in patients with Human Metapneumovirus infection stratified by sample origin

| Variables | Total (n = 526) | BALF (n = 93) | Nasopharyngeal Swab (n = 427) | Sputum (n = 6) | Statistic | P-values |
| --- | --- | --- | --- | --- | --- | --- |
| Fusobacterium nucleatum class, n(%) | 135 (25.67) | 6 (6.45) | 129 (30.21) | 0 (0.00) | - | <.001 |
| Human herpesvirus 5 class, n(%) | 7 (1.33) | 6 (6.45) | 0 (0.00) | 1 (16.67) | - | <.001 |
| Tropheryma whipplei class, n(%) | 10 (1.90) | 7 (7.53) | 3 (0.70) | 0 (0.00) | - | <.001 |
| Pneumocystis jirovecii class, n(%) | 8 (1.52) | 6 (6.45) | 2 (0.47) | 0 (0.00) | - | 0.001 |
| Staphylococcus aureus class, n(%) | 59 (11.22) | 20 (21.51) | 39 (9.13) | 0 (0.00) | χ²=12.50 | 0.002 |
| Candida albicans class, n(%) | 41 (7.79) | 15 (16.13) | 25 (5.85) | 1 (16.67) | χ²=11.88 | 0.003 |
| Bordetella pertussis class, n(%) | 14 (2.66) | 6 (6.45) | 7 (1.64) | 1 (16.67) | - | 0.006 |
| Rhinovirus C class, n(%) | 23 (4.37) | 3 (3.23) | 18 (4.22) | 2 (33.33) | - | 0.036 |
| Human herpesvirus 6 class, n(%) | 4 (0.76) | 3 (3.23) | 1 (0.23) | 0 (0.00) | - | 0.039 |
| Klebsiella aerogenes class, n(%) | 4 (0.76) | 3 (3.23) | 1 (0.23) | 0 (0.00) | - | 0.039 |
| Mycoplasma pneumoniae class, n(%) | 68 (12.93) | 19 (20.43) | 49 (11.48) | 0 (0.00) | χ²=6.34 | 0.042 |
| Klebsiella pneumoniae class, n(%) | 24 (4.56) | 0 (0.00) | 24 (5.62) | 0 (0.00) | - | 0.046 |
| Human bocavirus 1 class, n(%) | 14 (2.66) | 6 (6.45) | 8 (1.87) | 0 (0.00) | - | 0.050 |
| Human adenovirus B class, n(%) | 2 (0.38) | 2 (2.15) | 0 (0.00) | 0 (0.00) | - | 0.054 |
| Human herpesvirus 4 class, n(%) | 2 (0.38) | 2 (2.15) | 0 (0.00) | 0 (0.00) | - | 0.054 |
| Influenza C virus class, n(%) | 2 (0.38) | 2 (2.15) | 0 (0.00) | 0 (0.00) | - | 0.054 |
| Streptococcus mitis group class, n(%) | 40 (7.60) | 2 (2.15) | 38 (8.90) | 0 (0.00) | χ²=5.45 | 0.066 |
| Haemophilus influenzae class, n(%) | 221 (42.02) | 30 (32.26) | 188 (44.03) | 3 (50.00) | - | 0.096 |
| Rhinovirus A class, n(%) | 42 (7.98) | 12 (12.90) | 29 (6.79) | 1 (16.67) | χ²=4.51 | 0.105 |
| Haemophilus haemolyticus class, n(%) | 3 (0.57) | 2 (2.15) | 1 (0.23) | 0 (0.00) | - | 0.115 |
| Legionella pneumophila class, n(%) | 3 (0.57) | 2 (2.15) | 1 (0.23) | 0 (0.00) | - | 0.115 |
| Human herpesvirus 7 class, n(%) | 12 (2.28) | 1 (1.08) | 10 (2.34) | 1 (16.67) | - | 0.133 |
| Acinetobacter calcoaceticus baumannii complex class, n(%) | 1 (0.19) | 1 (1.08) | 0 (0.00) | 0 (0.00) | - | 0.188 |
| Enterococcus faecium class, n(%) | 1 (0.19) | 1 (1.08) | 0 (0.00) | 0 (0.00) | - | 0.188 |
| Enterovirus B class, n(%) | 1 (0.19) | 1 (1.08) | 0 (0.00) | 0 (0.00) | - | 0.188 |
| Human adenovirus 57 class, n(%) | 1 (0.19) | 1 (1.08) | 0 (0.00) | 0 (0.00) | - | 0.188 |
| Human adenovirus 7 class, n(%) | 1 (0.19) | 1 (1.08) | 0 (0.00) | 0 (0.00) | - | 0.188 |
| MRSA class, n(%) | 1 (0.19) | 1 (1.08) | 0 (0.00) | 0 (0.00) | - | 0.188 |
| Neisseria meningitidis class, n(%) | 1 (0.19) | 1 (1.08) | 0 (0.00) | 0 (0.00) | - | 0.188 |
| Stenotrophomonas maltophilia class, n(%) | 1 (0.19) | 1 (1.08) | 0 (0.00) | 0 (0.00) | - | 0.188 |
| Varicella zoster virus class, n(%) | 1 (0.19) | 1 (1.08) | 0 (0.00) | 0 (0.00) | - | 0.188 |
| Cytomegalovirus class, n(%) | 38 (7.22) | 3 (3.23) | 35 (8.20) | 0 (0.00) | χ²=3.29 | 0.193 |
| Macrolide antibiotics class, n(%) | 37 (7.03) | 3 (3.23) | 34 (7.96) | 0 (0.00) | χ²=3.08 | 0.214 |
| Candida tropicalis class, n(%) | 12 (2.28) | 0 (0.00) | 12 (2.81) | 0 (0.00) | - | 0.249 |
| Streptococcus anginosus group class, n(%) | 11 (2.09) | 0 (0.00) | 11 (2.58) | 0 (0.00) | - | 0.320 |
| Pseudomonas aeruginosa class, n(%) | 6 (1.14) | 2 (2.15) | 4 (0.94) | 0 (0.00) | - | 0.340 |
| Coxsackievirus A10 class, n(%) | 2 (0.38) | 1 (1.08) | 1 (0.23) | 0 (0.00) | - | 0.341 |
| Enterovirus A class, n(%) | 2 (0.38) | 1 (1.08) | 1 (0.23) | 0 (0.00) | - | 0.341 |
| Enterovirus D68 class, n(%) | 2 (0.38) | 1 (1.08) | 1 (0.23) | 0 (0.00) | - | 0.341 |
| Streptococcus pyogenes class, n(%) | 2 (0.38) | 1 (1.08) | 1 (0.23) | 0 (0.00) | - | 0.341 |
| Candida parapsilosis class, n(%) | 9 (1.71) | 0 (0.00) | 9 (2.11) | 0 (0.00) | - | 0.435 |
| Human RSV B class, n(%) | 9 (1.71) | 0 (0.00) | 9 (2.11) | 0 (0.00) | - | 0.435 |
| Rhinovirus B class, n(%) | 9 (1.71) | 0 (0.00) | 9 (2.11) | 0 (0.00) | - | 0.435 |
| Human adenovirus C class, n(%) | 3 (0.57) | 1 (1.08) | 2 (0.47) | 0 (0.00) | - | 0.466 |
| Streptococcus pneumoniae class, n(%) | 151 (28.71) | 25 (26.88) | 123 (28.81) | 3 (50.00) | - | 0.474 |
| Human parainfluenza virus 1 class, n(%) | 4 (0.76) | 1 (1.08) | 3 (0.70) | 0 (0.00) | - | 0.567 |
| Human RSV A class, n(%) | 6 (1.14) | 0 (0.00) | 6 (1.41) | 0 (0.00) | - | 0.624 |
| HSV1 class, n(%) | 9 (1.71) | 2 (2.15) | 7 (1.64) | 0 (0.00) | - | 0.699 |
| EBV class, n(%) | 39 (7.41) | 8 (8.60) | 31 (7.26) | 0 (0.00) | χ²=0.69 | 0.709 |
| Streptococcus intermedius class, n(%) | 39 (7.41) | 6 (6.45) | 33 (7.73) | 0 (0.00) | χ²=0.67 | 0.716 |
| Moraxella catarrhalis class, n(%) | 94 (17.87) | 14 (15.05) | 79 (18.50) | 1 (16.67) | - | 0.819 |
| Acinetobacter baumannii class, n(%) | 22 (4.18) | 4 (4.30) | 18 (4.22) | 0 (0.00) | - | 1.000 |
| Bordetella parapertussis class, n(%) | 1 (0.19) | 0 (0.00) | 1 (0.23) | 0 (0.00) | - | 1.000 |
| Burkholderia cepacia complex class, n(%) | 1 (0.19) | 0 (0.00) | 1 (0.23) | 0 (0.00) | - | 1.000 |
| Candida krusei class, n(%) | 2 (0.38) | 0 (0.00) | 2 (0.47) | 0 (0.00) | - | 1.000 |
| Coxsackievirus A16 class, n(%) | 1 (0.19) | 0 (0.00) | 1 (0.23) | 0 (0.00) | - | 1.000 |
| Coxsackievirus A6 class, n(%) | 1 (0.19) | 0 (0.00) | 1 (0.23) | 0 (0.00) | - | 1.000 |
| Escherichia coli class, n(%) | 8 (1.52) | 1 (1.08) | 7 (1.64) | 0 (0.00) | - | 1.000 |
| Human adenovirus 2 class, n(%) | 1 (0.19) | 0 (0.00) | 1 (0.23) | 0 (0.00) | - | 1.000 |
| Human adenovirus 3 class, n(%) | 6 (1.14) | 1 (1.08) | 5 (1.17) | 0 (0.00) | - | 1.000 |
| Human adenovirus 5 class, n(%) | 2 (0.38) | 0 (0.00) | 2 (0.47) | 0 (0.00) | - | 1.000 |
| Human coronavirus 229E class, n(%) | 1 (0.19) | 0 (0.00) | 1 (0.23) | 0 (0.00) | - | 1.000 |
| Human coronavirus HKU1 class, n(%) | 4 (0.76) | 0 (0.00) | 4 (0.94) | 0 (0.00) | - | 1.000 |
| Human coronavirus OC43 class, n(%) | 2 (0.38) | 0 (0.00) | 2 (0.47) | 0 (0.00) | - | 1.000 |
| Human herpesvirus 6B class, n(%) | 5 (0.95) | 1 (1.08) | 4 (0.94) | 0 (0.00) | - | 1.000 |
| Human parainfluenza virus 3 class, n(%) | 18 (3.42) | 3 (3.23) | 15 (3.51) | 0 (0.00) | - | 1.000 |
| Influenza A H1N1 2009 class, n(%) | 1 (0.19) | 0 (0.00) | 1 (0.23) | 0 (0.00) | - | 1.000 |
| Influenza A H3N2 class, n(%) | 1 (0.19) | 0 (0.00) | 1 (0.23) | 0 (0.00) | - | 1.000 |
| Influenza B Victoria class, n(%) | 5 (0.95) | 1 (1.08) | 4 (0.94) | 0 (0.00) | - | 1.000 |
| Klebsiella oxytoca class, n(%) | 2 (0.38) | 0 (0.00) | 2 (0.47) | 0 (0.00) | - | 1.000 |
| Klebsiella variicola class, n(%) | 1 (0.19) | 0 (0.00) | 1 (0.23) | 0 (0.00) | - | 1.000 |
| Measles virus class, n(%) | 1 (0.19) | 0 (0.00) | 1 (0.23) | 0 (0.00) | - | 1.000 |
| MRSA resistance gene class, n(%) | 3 (0.57) | 0 (0.00) | 3 (0.70) | 0 (0.00) | - | 1.000 |
| Parvimonas micra class, n(%) | 2 (0.38) | 0 (0.00) | 2 (0.47) | 0 (0.00) | - | 1.000 |
| Rhinovirus class, n(%) | 4 (0.76) | 0 (0.00) | 4 (0.94) | 0 (0.00) | - | 1.000 |
| SARS CoV 2 class, n(%) | 3 (0.57) | 0 (0.00) | 3 (0.70) | 0 (0.00) | - | 1.000 |
| Streptococcus agalactiae class, n(%) | 1 (0.19) | 0 (0.00) | 1 (0.23) | 0 (0.00) | - | 1.000 |
| Ureaplasma parvum class, n(%) | 1 (0.19) | 0 (0.00) | 1 (0.23) | 0 (0.00) | - | 1.000 |
| WU polyomavirus class, n(%) | 4 (0.76) | 0 (0.00) | 4 (0.94) | 0 (0.00) | - | 1.000 |

Note: tNGS, targeted next-generation sequencing; BALF, Bronchoalveolar Lavage Fluid; EBV, Epstein-Barr virus; HSV1, Herpes simplex virus type 1; MRSA, Methicillin-resistant Staphylococcus aureus; RSV, Respiratory Syncytial Virus. The threshold for statistical significance is P-values < 0.05.

Supplementary Table 4. tNGS findings in patients with Human Metapneumovirus infection across years

| Variables | Total (n = 526) | 2022 (n = 43) | 2023 (n = 148) | 2024 (n = 248) | 2025 (n = 87) | Statistic | P-values |
| --- | --- | --- | --- | --- | --- | --- | --- |
| Fusobacterium nucleatum class, n(%) | 135 (25.67) | 0 (0.00) | 54 (36.49) | 74 (29.84) | 7 (8.05) | χ²=40.35 | <.001 |
| Haemophilus haemolyticus class, n(%) | 3 (0.57) | 3 (6.98) | 0 (0.00) | 0 (0.00) | 0 (0.00) | - | <.001 |
| Haemophilus influenzae class, n(%) | 221 (42.02) | 17 (39.53) | 47 (31.76) | 131 (52.82) | 26 (29.89) | χ²=23.65 | <.001 |
| Human herpesvirus 5 class, n(%) | 7 (1.33) | 7 (16.28) | 0 (0.00) | 0 (0.00) | 0 (0.00) | - | <.001 |
| Moraxella catarrhalis class, n(%) | 94 (17.87) | 5 (11.63) | 29 (19.59) | 31 (12.50) | 29 (33.33) | χ²=20.49 | <.001 |
| Mycoplasma pneumoniae class, n(%) | 68 (12.93) | 10 (23.26) | 26 (17.57) | 32 (12.90) | 0 (0.00) | χ²=19.82 | <.001 |
| Pneumocystis jirovecii class, n(%) | 8 (1.52) | 6 (13.95) | 0 (0.00) | 0 (0.00) | 2 (2.30) | - | <.001 |
| Streptococcus mitis group class, n(%) | 40 (7.60) | 0 (0.00) | 0 (0.00) | 0 (0.00) | 40 (45.98) | χ²=218.45 | <.001 |
| Human bocavirus 1 class, n(%) | 14 (2.66) | 3 (6.98) | 9 (6.08) | 2 (0.81) | 0 (0.00) | - | 0.001 |
| Macrolide antibiotics class, n(%) | 37 (7.03) | 0 (0.00) | 11 (7.43) | 26 (10.48) | 0 (0.00) | χ²=14.39 | 0.002 |
| Human herpesvirus 6 class, n(%) | 4 (0.76) | 3 (6.98) | 0 (0.00) | 1 (0.40) | 0 (0.00) | - | 0.003 |
| Streptococcus intermedius class, n(%) | 39 (7.41) | 0 (0.00) | 20 (13.51) | 14 (5.65) | 5 (5.75) | χ²=12.95 | 0.005 |
| Human adenovirus B class, n(%) | 2 (0.38) | 2 (4.65) | 0 (0.00) | 0 (0.00) | 0 (0.00) | - | 0.007 |
| Human herpesvirus 4 class, n(%) | 2 (0.38) | 2 (4.65) | 0 (0.00) | 0 (0.00) | 0 (0.00) | - | 0.007 |
| Streptococcus pneumoniae class, n(%) | 151 (28.71) | 9 (20.93) | 56 (37.84) | 58 (23.39) | 28 (32.18) | χ²=11.24 | 0.010 |
| Acinetobacter baumannii class, n(%) | 22 (4.18) | 6 (13.95) | 7 (4.73) | 8 (3.23) | 1 (1.15) | - | 0.013 |
| Rhinovirus A class, n(%) | 42 (7.98) | 6 (13.95) | 18 (12.16) | 11 (4.44) | 7 (8.05) | χ²=9.85 | 0.020 |
| Rhinovirus B class, n(%) | 9 (1.71) | 0 (0.00) | 7 (4.73) | 2 (0.81) | 0 (0.00) | - | 0.022 |
| Tropheryma whipplei class, n(%) | 10 (1.90) | 2 (4.65) | 4 (2.70) | 1 (0.40) | 3 (3.45) | - | 0.030 |
| Human herpesvirus 6B class, n(%) | 5 (0.95) | 0 (0.00) | 4 (2.70) | 0 (0.00) | 1 (1.15) | - | 0.034 |
| Human herpesvirus 7 class, n(%) | 12 (2.28) | 3 (6.98) | 5 (3.38) | 2 (0.81) | 2 (2.30) | - | 0.043 |
| Human coronavirus HKU1 class, n(%) | 4 (0.76) | 0 (0.00) | 0 (0.00) | 1 (0.40) | 3 (3.45) | - | 0.052 |
| Human RSV A class, n(%) | 6 (1.14) | 0 (0.00) | 5 (3.38) | 1 (0.40) | 0 (0.00) | - | 0.053 |
| Bordetella pertussis class, n(%) | 14 (2.66) | 4 (9.30) | 3 (2.03) | 6 (2.42) | 1 (1.15) | - | 0.073 |
| Cytomegalovirus class, n(%) | 38 (7.22) | 0 (0.00) | 12 (8.11) | 23 (9.27) | 3 (3.45) | χ²=6.93 | 0.074 |
| Enterococcus faecium class, n(%) | 1 (0.19) | 1 (2.33) | 0 (0.00) | 0 (0.00) | 0 (0.00) | - | 0.082 |
| Enterovirus B class, n(%) | 1 (0.19) | 1 (2.33) | 0 (0.00) | 0 (0.00) | 0 (0.00) | - | 0.082 |
| MRSA class, n(%) | 1 (0.19) | 1 (2.33) | 0 (0.00) | 0 (0.00) | 0 (0.00) | - | 0.082 |
| Neisseria meningitidis class, n(%) | 1 (0.19) | 1 (2.33) | 0 (0.00) | 0 (0.00) | 0 (0.00) | - | 0.082 |
| Stenotrophomonas maltophilia class, n(%) | 1 (0.19) | 1 (2.33) | 0 (0.00) | 0 (0.00) | 0 (0.00) | - | 0.082 |
| Ureaplasma parvum class, n(%) | 1 (0.19) | 1 (2.33) | 0 (0.00) | 0 (0.00) | 0 (0.00) | - | 0.082 |
| Klebsiella aerogenes class, n(%) | 4 (0.76) | 1 (2.33) | 0 (0.00) | 1 (0.40) | 2 (2.30) | - | 0.084 |
| Candida albicans class, n(%) | 41 (7.79) | 7 (16.28) | 13 (8.78) | 14 (5.65) | 7 (8.05) | χ²=6.11 | 0.106 |
| Rhinovirus class, n(%) | 4 (0.76) | 0 (0.00) | 2 (1.35) | 0 (0.00) | 2 (2.30) | - | 0.110 |
| Human parainfluenza virus 1 class, n(%) | 4 (0.76) | 0 (0.00) | 3 (2.03) | 0 (0.00) | 1 (1.15) | - | 0.125 |
| Staphylococcus aureus class, n(%) | 59 (11.22) | 8 (18.60) | 18 (12.16) | 21 (8.47) | 12 (13.79) | χ²=4.95 | 0.175 |
| Enterovirus D68 class, n(%) | 2 (0.38) | 1 (2.33) | 0 (0.00) | 1 (0.40) | 0 (0.00) | - | 0.184 |
| EBV class, n(%) | 39 (7.41) | 0 (0.00) | 10 (6.76) | 20 (8.06) | 9 (10.34) | χ²=4.78 | 0.189 |
| Pseudomonas aeruginosa class, n(%) | 6 (1.14) | 0 (0.00) | 4 (2.70) | 1 (0.40) | 1 (1.15) | - | 0.195 |
| Acinetobacter calcoaceticus baumannii complex class, n(%) | 1 (0.19) | 0 (0.00) | 0 (0.00) | 0 (0.00) | 1 (1.15) | - | 0.247 |
| Human adenovirus 57 class, n(%) | 1 (0.19) | 0 (0.00) | 0 (0.00) | 0 (0.00) | 1 (1.15) | - | 0.247 |
| Klebsiella variicola class, n(%) | 1 (0.19) | 0 (0.00) | 0 (0.00) | 0 (0.00) | 1 (1.15) | - | 0.247 |
| Escherichia coli class, n(%) | 8 (1.52) | 1 (2.33) | 2 (1.35) | 2 (0.81) | 3 (3.45) | - | 0.248 |
| Candida krusei class, n(%) | 2 (0.38) | 0 (0.00) | 2 (1.35) | 0 (0.00) | 0 (0.00) | - | 0.263 |
| Klebsiella pneumoniae class, n(%) | 24 (4.56) | 3 (6.98) | 8 (5.41) | 12 (4.84) | 1 (1.15) | - | 0.290 |
| Streptococcus anginosus group class, n(%) | 11 (2.09) | 0 (0.00) | 3 (2.03) | 8 (3.23) | 0 (0.00) | - | 0.320 |
| Human adenovirus C class, n(%) | 3 (0.57) | 1 (2.33) | 1 (0.68) | 1 (0.40) | 0 (0.00) | - | 0.353 |
| Enterovirus A class, n(%) | 2 (0.38) | 0 (0.00) | 1 (0.68) | 0 (0.00) | 1 (1.15) | - | 0.356 |
| HSV1 class, n(%) | 9 (1.71) | 0 (0.00) | 1 (0.68) | 5 (2.02) | 3 (3.45) | - | 0.364 |
| WU polyomavirus class, n(%) | 4 (0.76) | 0 (0.00) | 0 (0.00) | 4 (1.61) | 0 (0.00) | - | 0.446 |
| Legionella pneumophila class, n(%) | 3 (0.57) | 0 (0.00) | 0 (0.00) | 3 (1.21) | 0 (0.00) | - | 0.457 |
| SARS CoV 2 class, n(%) | 3 (0.57) | 0 (0.00) | 0 (0.00) | 3 (1.21) | 0 (0.00) | - | 0.457 |
| Human coronavirus OC43 class, n(%) | 2 (0.38) | 0 (0.00) | 0 (0.00) | 1 (0.40) | 1 (1.15) | - | 0.512 |
| Streptococcus pyogenes class, n(%) | 2 (0.38) | 0 (0.00) | 0 (0.00) | 1 (0.40) | 1 (1.15) | - | 0.512 |
| Burkholderia cepacia complex class, n(%) | 1 (0.19) | 0 (0.00) | 1 (0.68) | 0 (0.00) | 0 (0.00) | - | 0.529 |
| Coxsackievirus A6 class, n(%) | 1 (0.19) | 0 (0.00) | 1 (0.68) | 0 (0.00) | 0 (0.00) | - | 0.529 |
| Human adenovirus 2 class, n(%) | 1 (0.19) | 0 (0.00) | 1 (0.68) | 0 (0.00) | 0 (0.00) | - | 0.529 |
| Human coronavirus 229E class, n(%) | 1 (0.19) | 0 (0.00) | 1 (0.68) | 0 (0.00) | 0 (0.00) | - | 0.529 |
| Streptococcus agalactiae class, n(%) | 1 (0.19) | 0 (0.00) | 1 (0.68) | 0 (0.00) | 0 (0.00) | - | 0.529 |
| Human parainfluenza virus 3 class, n(%) | 18 (3.42) | 1 (2.33) | 7 (4.73) | 9 (3.63) | 1 (1.15) | - | 0.561 |
| Human adenovirus 3 class, n(%) | 6 (1.14) | 0 (0.00) | 3 (2.03) | 3 (1.21) | 0 (0.00) | - | 0.642 |
| Candida parapsilosis class, n(%) | 9 (1.71) | 0 (0.00) | 4 (2.70) | 3 (1.21) | 2 (2.30) | - | 0.673 |
| Candida tropicalis class, n(%) | 12 (2.28) | 0 (0.00) | 5 (3.38) | 6 (2.42) | 1 (1.15) | - | 0.677 |
| Influenza B Victoria class, n(%) | 5 (0.95) | 0 (0.00) | 1 (0.68) | 4 (1.61) | 0 (0.00) | - | 0.731 |
| Human RSV B class, n(%) | 9 (1.71) | 0 (0.00) | 4 (2.70) | 4 (1.61) | 1 (1.15) | - | 0.732 |
| Human adenovirus 5 class, n(%) | 2 (0.38) | 0 (0.00) | 0 (0.00) | 2 (0.81) | 0 (0.00) | - | 0.734 |
| Influenza C virus class, n(%) | 2 (0.38) | 0 (0.00) | 0 (0.00) | 2 (0.81) | 0 (0.00) | - | 0.734 |
| Klebsiella oxytoca class, n(%) | 2 (0.38) | 0 (0.00) | 0 (0.00) | 2 (0.81) | 0 (0.00) | - | 0.734 |
| Rhinovirus C class, n(%) | 23 (4.37) | 2 (4.65) | 7 (4.73) | 11 (4.44) | 3 (3.45) | - | 0.987 |
| Bordetella parapertussis class, n(%) | 1 (0.19) | 0 (0.00) | 0 (0.00) | 1 (0.40) | 0 (0.00) | - | 1.000 |
| Coxsackievirus A10 class, n(%) | 2 (0.38) | 0 (0.00) | 1 (0.68) | 1 (0.40) | 0 (0.00) | - | 1.000 |
| Coxsackievirus A16 class, n(%) | 1 (0.19) | 0 (0.00) | 0 (0.00) | 1 (0.40) | 0 (0.00) | - | 1.000 |
| Human adenovirus 7 class, n(%) | 1 (0.19) | 0 (0.00) | 0 (0.00) | 1 (0.40) | 0 (0.00) | - | 1.000 |
| Influenza A H1N1 2009 class, n(%) | 1 (0.19) | 0 (0.00) | 0 (0.00) | 1 (0.40) | 0 (0.00) | - | 1.000 |
| Influenza A H3N2 class, n(%) | 1 (0.19) | 0 (0.00) | 0 (0.00) | 1 (0.40) | 0 (0.00) | - | 1.000 |
| Measles virus class, n(%) | 1 (0.19) | 0 (0.00) | 0 (0.00) | 1 (0.40) | 0 (0.00) | - | 1.000 |
| MRSA resistance gene class, n(%) | 3 (0.57) | 0 (0.00) | 1 (0.68) | 2 (0.81) | 0 (0.00) | - | 1.000 |
| Parvimonas micra class, n(%) | 2 (0.38) | 0 (0.00) | 1 (0.68) | 1 (0.40) | 0 (0.00) | - | 1.000 |
| Varicella zoster virus class, n(%) | 1 (0.19) | 0 (0.00) | 0 (0.00) | 1 (0.40) | 0 (0.00) | - | 1.000 |

Note: tNGS, targeted next-generation sequencing; EBV, Epstein-Barr virus; HSV1, Herpes simplex virus type 1; MRSA, Methicillin-resistant Staphylococcus aureus; RSV, Respiratory Syncytial Virus. The threshold for statistical significance is P-values < 0.05.

Supplementary Table 5. tNGS findings in patients with Human Metapneumovirus infection stratified by immune deficiency

| Variables | Total (n = 526) | Without Immune Deficiency (n = 501) | With Immune Deficiency (n = 25) | Statistic | P-values |
| --- | --- | --- | --- | --- | --- |
| Streptococcus intermedius class, n(%) | 39 (7.41) | 34 (6.79) | 5 (20.00) | χ²=4.28 | 0.038 |
| Stenotrophomonas maltophilia class, n(%) | 1 (0.19) | 0 (0.00) | 1 (4.00) | - | 0.048 |
| Tropheryma whipplei class, n(%) | 10 (1.90) | 8 (1.60) | 2 (8.00) | - | 0.077 |
| Streptococcus pneumoniae class, n(%) | 151 (28.71) | 140 (27.94) | 11 (44.00) | χ²=3.00 | 0.083 |
| Human herpesvirus 7 class, n(%) | 12 (2.28) | 10 (2.00) | 2 (8.00) | - | 0.107 |
| Human bocavirus 1 class, n(%) | 14 (2.66) | 12 (2.40) | 2 (8.00) | - | 0.139 |
| EBV class, n(%) | 39 (7.41) | 39 (7.78) | 0 (0.00) | χ²=1.12 | 0.290 |
| Human herpesvirus 5 class, n(%) | 7 (1.33) | 6 (1.20) | 1 (4.00) | - | 0.290 |
| Cytomegalovirus class, n(%) | 38 (7.22) | 38 (7.58) | 0 (0.00) | χ²=1.07 | 0.301 |
| Macrolide antibiotics class, n(%) | 37 (7.03) | 37 (7.39) | 0 (0.00) | χ²=1.02 | 0.313 |
| Candida parapsilosis class, n(%) | 9 (1.71) | 8 (1.60) | 1 (4.00) | - | 0.357 |
| HSV1 class, n(%) | 9 (1.71) | 8 (1.60) | 1 (4.00) | - | 0.357 |
| Human RSV B class, n(%) | 9 (1.71) | 8 (1.60) | 1 (4.00) | - | 0.357 |
| Streptococcus anginosus group class, n(%) | 11 (2.09) | 10 (2.00) | 1 (4.00) | - | 0.418 |
| Klebsiella pneumoniae class, n(%) | 24 (4.56) | 24 (4.79) | 0 (0.00) | χ²=0.40 | 0.529 |
| Haemophilus influenzae class, n(%) | 221 (42.02) | 212 (42.32) | 9 (36.00) | χ²=0.39 | 0.532 |
| Rhinovirus C class, n(%) | 23 (4.37) | 23 (4.59) | 0 (0.00) | χ²=0.35 | 0.552 |
| Acinetobacter baumannii class, n(%) | 22 (4.18) | 22 (4.39) | 0 (0.00) | χ²=0.31 | 0.576 |
| Moraxella catarrhalis class, n(%) | 94 (17.87) | 91 (18.16) | 3 (12.00) | χ²=0.27 | 0.605 |
| Rhinovirus A class, n(%) | 42 (7.98) | 41 (8.18) | 1 (4.00) | χ²=0.14 | 0.708 |
| Streptococcus mitis group class, n(%) | 40 (7.60) | 39 (7.78) | 1 (4.00) | χ²=0.10 | 0.756 |
| Staphylococcus aureus class, n(%) | 59 (11.22) | 57 (11.38) | 2 (8.00) | χ²=0.04 | 0.843 |
| Fusobacterium nucleatum class, n(%) | 135 (25.67) | 129 (25.75) | 6 (24.00) | χ²=0.04 | 0.845 |
| Mycoplasma pneumoniae class, n(%) | 68 (12.93) | 64 (12.77) | 4 (16.00) | χ²=0.03 | 0.870 |
| Acinetobacter calcoaceticus baumannii complex class, n(%) | 1 (0.19) | 1 (0.20) | 0 (0.00) | - | 1.000 |
| Bordetella parapertussis class, n(%) | 1 (0.19) | 1 (0.20) | 0 (0.00) | - | 1.000 |
| Bordetella pertussis class, n(%) | 14 (2.66) | 14 (2.79) | 0 (0.00) | - | 1.000 |
| Burkholderia cepacia complex class, n(%) | 1 (0.19) | 1 (0.20) | 0 (0.00) | - | 1.000 |
| Candida albicans class, n(%) | 41 (7.79) | 39 (7.78) | 2 (8.00) | χ²=0.00 | 1.000 |
| Candida krusei class, n(%) | 2 (0.38) | 2 (0.40) | 0 (0.00) | - | 1.000 |
| Candida tropicalis class, n(%) | 12 (2.28) | 12 (2.40) | 0 (0.00) | - | 1.000 |
| Coxsackievirus A10 class, n(%) | 2 (0.38) | 2 (0.40) | 0 (0.00) | - | 1.000 |
| Coxsackievirus A16 class, n(%) | 1 (0.19) | 1 (0.20) | 0 (0.00) | - | 1.000 |
| Coxsackievirus A6 class, n(%) | 1 (0.19) | 1 (0.20) | 0 (0.00) | - | 1.000 |
| Enterococcus faecium class, n(%) | 1 (0.19) | 1 (0.20) | 0 (0.00) | - | 1.000 |
| Enterovirus A class, n(%) | 2 (0.38) | 2 (0.40) | 0 (0.00) | - | 1.000 |
| Enterovirus B class, n(%) | 1 (0.19) | 1 (0.20) | 0 (0.00) | - | 1.000 |
| Enterovirus D68 class, n(%) | 2 (0.38) | 2 (0.40) | 0 (0.00) | - | 1.000 |
| Escherichia coli class, n(%) | 8 (1.52) | 8 (1.60) | 0 (0.00) | - | 1.000 |
| Haemophilus haemolyticus class, n(%) | 3 (0.57) | 3 (0.60) | 0 (0.00) | - | 1.000 |
| Human adenovirus 2 class, n(%) | 1 (0.19) | 1 (0.20) | 0 (0.00) | - | 1.000 |
| Human adenovirus 3 class, n(%) | 6 (1.14) | 6 (1.20) | 0 (0.00) | - | 1.000 |
| Human adenovirus 5 class, n(%) | 2 (0.38) | 2 (0.40) | 0 (0.00) | - | 1.000 |
| Human adenovirus 57 class, n(%) | 1 (0.19) | 1 (0.20) | 0 (0.00) | - | 1.000 |
| Human adenovirus 7 class, n(%) | 1 (0.19) | 1 (0.20) | 0 (0.00) | - | 1.000 |
| Human adenovirus B class, n(%) | 2 (0.38) | 2 (0.40) | 0 (0.00) | - | 1.000 |
| Human adenovirus C class, n(%) | 3 (0.57) | 3 (0.60) | 0 (0.00) | - | 1.000 |
| Human coronavirus 229E class, n(%) | 1 (0.19) | 1 (0.20) | 0 (0.00) | - | 1.000 |
| Human coronavirus HKU1 class, n(%) | 4 (0.76) | 4 (0.80) | 0 (0.00) | - | 1.000 |
| Human coronavirus OC43 class, n(%) | 2 (0.38) | 2 (0.40) | 0 (0.00) | - | 1.000 |
| Human herpesvirus 4 class, n(%) | 2 (0.38) | 2 (0.40) | 0 (0.00) | - | 1.000 |
| Human herpesvirus 6 class, n(%) | 4 (0.76) | 4 (0.80) | 0 (0.00) | - | 1.000 |
| Human herpesvirus 6B class, n(%) | 5 (0.95) | 5 (1.00) | 0 (0.00) | - | 1.000 |
| Human parainfluenza virus 1 class, n(%) | 4 (0.76) | 4 (0.80) | 0 (0.00) | - | 1.000 |
| Human parainfluenza virus 3 class, n(%) | 18 (3.42) | 18 (3.59) | 0 (0.00) | - | 1.000 |
| Human RSV A class, n(%) | 6 (1.14) | 6 (1.20) | 0 (0.00) | - | 1.000 |
| Influenza A H1N1 2009 class, n(%) | 1 (0.19) | 1 (0.20) | 0 (0.00) | - | 1.000 |
| Influenza A H3N2 class, n(%) | 1 (0.19) | 1 (0.20) | 0 (0.00) | - | 1.000 |
| Influenza B Victoria class, n(%) | 5 (0.95) | 5 (1.00) | 0 (0.00) | - | 1.000 |
| Influenza C virus class, n(%) | 2 (0.38) | 2 (0.40) | 0 (0.00) | - | 1.000 |
| Klebsiella aerogenes class, n(%) | 4 (0.76) | 4 (0.80) | 0 (0.00) | - | 1.000 |
| Klebsiella oxytoca class, n(%) | 2 (0.38) | 2 (0.40) | 0 (0.00) | - | 1.000 |
| Klebsiella variicola class, n(%) | 1 (0.19) | 1 (0.20) | 0 (0.00) | - | 1.000 |
| Legionella pneumophila class, n(%) | 3 (0.57) | 3 (0.60) | 0 (0.00) | - | 1.000 |
| Measles virus class, n(%) | 1 (0.19) | 1 (0.20) | 0 (0.00) | - | 1.000 |
| MRSA class, n(%) | 1 (0.19) | 1 (0.20) | 0 (0.00) | - | 1.000 |
| MRSA resistance gene class, n(%) | 3 (0.57) | 3 (0.60) | 0 (0.00) | - | 1.000 |
| Neisseria meningitidis class, n(%) | 1 (0.19) | 1 (0.20) | 0 (0.00) | - | 1.000 |
| Parvimonas micra class, n(%) | 2 (0.38) | 2 (0.40) | 0 (0.00) | - | 1.000 |
| Pneumocystis jirovecii class, n(%) | 8 (1.52) | 8 (1.60) | 0 (0.00) | - | 1.000 |
| Pseudomonas aeruginosa class, n(%) | 6 (1.14) | 6 (1.20) | 0 (0.00) | - | 1.000 |
| Rhinovirus B class, n(%) | 9 (1.71) | 9 (1.80) | 0 (0.00) | - | 1.000 |
| Rhinovirus class, n(%) | 4 (0.76) | 4 (0.80) | 0 (0.00) | - | 1.000 |
| SARS CoV 2 class, n(%) | 3 (0.57) | 3 (0.60) | 0 (0.00) | - | 1.000 |
| Streptococcus agalactiae class, n(%) | 1 (0.19) | 1 (0.20) | 0 (0.00) | - | 1.000 |
| Streptococcus pyogenes class, n(%) | 2 (0.38) | 2 (0.40) | 0 (0.00) | - | 1.000 |
| Ureaplasma parvum class, n(%) | 1 (0.19) | 1 (0.20) | 0 (0.00) | - | 1.000 |
| Varicella zoster virus class, n(%) | 1 (0.19) | 1 (0.20) | 0 (0.00) | - | 1.000 |
| WU polyomavirus class, n(%) | 4 (0.76) | 4 (0.80) | 0 (0.00) | - | 1.000 |

Note: tNGS, targeted next-generation sequencing; EBV, Epstein-Barr virus; HSV1, Herpes simplex virus type 1; MRSA, Methicillin-resistant Staphylococcus aureus; RSV, Respiratory Syncytial Virus. The threshold for statistical significance is P-values < 0.05.

Supplementary Table 6. tNGS findings in patients with Human Metapneumovirus infection stratified by whether undergoing complete immunization

| Variables | Total (n = 526) | Without Complete Immunization (n = 65) | With Complete Immunization (n = 461) | Statistic | P-values |
| --- | --- | --- | --- | --- | --- |
| Fusobacterium nucleatum class, n(%) | 135 (25.67) | 9 (13.85) | 126 (27.33) | χ²=5.43 | 0.020 |
| Candida albicans class, n(%) | 41 (7.79) | 9 (13.85) | 32 (6.94) | χ²=3.78 | 0.052 |
| Pneumocystis jirovecii class, n(%) | 8 (1.52) | 3 (4.62) | 5 (1.08) | - | 0.064 |
| Moraxella catarrhalis class, n(%) | 94 (17.87) | 7 (10.77) | 87 (18.87) | χ²=2.55 | 0.110 |
| Macrolide antibiotics class, n(%) | 37 (7.03) | 1 (1.54) | 36 (7.81) | χ²=2.53 | 0.111 |
| Stenotrophomonas maltophilia class, n(%) | 1 (0.19) | 1 (1.54) | 0 (0.00) | - | 0.124 |
| Acinetobacter baumannii class, n(%) | 22 (4.18) | 0 (0.00) | 22 (4.77) | χ²=2.16 | 0.142 |
| Human adenovirus 3 class, n(%) | 6 (1.14) | 2 (3.08) | 4 (0.87) | - | 0.163 |
| Staphylococcus aureus class, n(%) | 59 (11.22) | 4 (6.15) | 55 (11.93) | χ²=1.91 | 0.167 |
| Streptococcus mitis group class, n(%) | 40 (7.60) | 8 (12.31) | 32 (6.94) | χ²=1.63 | 0.201 |
| Human parainfluenza virus 3 class, n(%) | 18 (3.42) | 0 (0.00) | 18 (3.90) | χ²=1.58 | 0.209 |
| Human herpesvirus 5 class, n(%) | 7 (1.33) | 2 (3.08) | 5 (1.08) | - | 0.210 |
| Coxsackievirus A10 class, n(%) | 2 (0.38) | 1 (1.54) | 1 (0.22) | - | 0.232 |
| Haemophilus influenzae class, n(%) | 221 (42.02) | 23 (35.38) | 198 (42.95) | χ²=1.34 | 0.247 |
| Cytomegalovirus class, n(%) | 38 (7.22) | 2 (3.08) | 36 (7.81) | χ²=1.26 | 0.261 |
| Human adenovirus C class, n(%) | 3 (0.57) | 1 (1.54) | 2 (0.43) | - | 0.327 |
| SARS CoV 2 class, n(%) | 3 (0.57) | 1 (1.54) | 2 (0.43) | - | 0.327 |
| Klebsiella pneumoniae class, n(%) | 24 (4.56) | 1 (1.54) | 23 (4.99) | χ²=0.87 | 0.352 |
| Human herpesvirus 7 class, n(%) | 12 (2.28) | 3 (4.62) | 9 (1.95) | χ²=0.81 | 0.367 |
| Rhinovirus C class, n(%) | 23 (4.37) | 1 (1.54) | 22 (4.77) | χ²=0.76 | 0.384 |
| Streptococcus intermedius class, n(%) | 39 (7.41) | 7 (10.77) | 32 (6.94) | χ²=0.72 | 0.395 |
| Human herpesvirus 6 class, n(%) | 4 (0.76) | 1 (1.54) | 3 (0.65) | - | 0.411 |
| Influenza B Victoria class, n(%) | 5 (0.95) | 1 (1.54) | 4 (0.87) | - | 0.484 |
| EBV class, n(%) | 39 (7.41) | 3 (4.62) | 36 (7.81) | χ²=0.45 | 0.505 |
| Human RSV A class, n(%) | 6 (1.14) | 1 (1.54) | 5 (1.08) | - | 0.549 |
| Mycoplasma pneumoniae class, n(%) | 68 (12.93) | 7 (10.77) | 61 (13.23) | χ²=0.31 | 0.580 |
| Escherichia coli class, n(%) | 8 (1.52) | 0 (0.00) | 8 (1.74) | - | 0.604 |
| Streptococcus pneumoniae class, n(%) | 151 (28.71) | 20 (30.77) | 131 (28.42) | χ²=0.15 | 0.695 |
| Tropheryma whipplei class, n(%) | 10 (1.90) | 2 (3.08) | 8 (1.74) | χ²=0.07 | 0.798 |
| Rhinovirus A class, n(%) | 42 (7.98) | 5 (7.69) | 37 (8.03) | χ²=0.01 | 0.926 |
| Acinetobacter calcoaceticus baumannii complex class, n(%) | 1 (0.19) | 0 (0.00) | 1 (0.22) | - | 1.000 |
| Bordetella parapertussis class, n(%) | 1 (0.19) | 0 (0.00) | 1 (0.22) | - | 1.000 |
| Bordetella pertussis class, n(%) | 14 (2.66) | 2 (3.08) | 12 (2.60) | χ²=0.00 | 1.000 |
| Burkholderia cepacia complex class, n(%) | 1 (0.19) | 0 (0.00) | 1 (0.22) | - | 1.000 |
| Candida krusei class, n(%) | 2 (0.38) | 0 (0.00) | 2 (0.43) | - | 1.000 |
| Candida parapsilosis class, n(%) | 9 (1.71) | 1 (1.54) | 8 (1.74) | χ²=0.00 | 1.000 |
| Candida tropicalis class, n(%) | 12 (2.28) | 1 (1.54) | 11 (2.39) | χ²=0.00 | 1.000 |
| Coxsackievirus A16 class, n(%) | 1 (0.19) | 0 (0.00) | 1 (0.22) | - | 1.000 |
| Coxsackievirus A6 class, n(%) | 1 (0.19) | 0 (0.00) | 1 (0.22) | - | 1.000 |
| Enterococcus faecium class, n(%) | 1 (0.19) | 0 (0.00) | 1 (0.22) | - | 1.000 |
| Enterovirus A class, n(%) | 2 (0.38) | 0 (0.00) | 2 (0.43) | - | 1.000 |
| Enterovirus B class, n(%) | 1 (0.19) | 0 (0.00) | 1 (0.22) | - | 1.000 |
| Enterovirus D68 class, n(%) | 2 (0.38) | 0 (0.00) | 2 (0.43) | - | 1.000 |
| Haemophilus haemolyticus class, n(%) | 3 (0.57) | 0 (0.00) | 3 (0.65) | - | 1.000 |
| HSV1 class, n(%) | 9 (1.71) | 1 (1.54) | 8 (1.74) | χ²=0.00 | 1.000 |
| Human adenovirus 2 class, n(%) | 1 (0.19) | 0 (0.00) | 1 (0.22) | - | 1.000 |
| Human adenovirus 5 class, n(%) | 2 (0.38) | 0 (0.00) | 2 (0.43) | - | 1.000 |
| Human adenovirus 57 class, n(%) | 1 (0.19) | 0 (0.00) | 1 (0.22) | - | 1.000 |
| Human adenovirus 7 class, n(%) | 1 (0.19) | 0 (0.00) | 1 (0.22) | - | 1.000 |
| Human adenovirus B class, n(%) | 2 (0.38) | 0 (0.00) | 2 (0.43) | - | 1.000 |
| Human bocavirus 1 class, n(%) | 14 (2.66) | 2 (3.08) | 12 (2.60) | χ²=0.00 | 1.000 |
| Human coronavirus 229E class, n(%) | 1 (0.19) | 0 (0.00) | 1 (0.22) | - | 1.000 |
| Human coronavirus HKU1 class, n(%) | 4 (0.76) | 0 (0.00) | 4 (0.87) | - | 1.000 |
| Human coronavirus OC43 class, n(%) | 2 (0.38) | 0 (0.00) | 2 (0.43) | - | 1.000 |
| Human herpesvirus 4 class, n(%) | 2 (0.38) | 0 (0.00) | 2 (0.43) | - | 1.000 |
| Human herpesvirus 6B class, n(%) | 5 (0.95) | 0 (0.00) | 5 (1.08) | - | 1.000 |
| Human parainfluenza virus 1 class, n(%) | 4 (0.76) | 0 (0.00) | 4 (0.87) | - | 1.000 |
| Human RSV B class, n(%) | 9 (1.71) | 1 (1.54) | 8 (1.74) | χ²=0.00 | 1.000 |
| Influenza A H1N1 2009 class, n(%) | 1 (0.19) | 0 (0.00) | 1 (0.22) | - | 1.000 |
| Influenza A H3N2 class, n(%) | 1 (0.19) | 0 (0.00) | 1 (0.22) | - | 1.000 |
| Influenza C virus class, n(%) | 2 (0.38) | 0 (0.00) | 2 (0.43) | - | 1.000 |
| Klebsiella aerogenes class, n(%) | 4 (0.76) | 0 (0.00) | 4 (0.87) | - | 1.000 |
| Klebsiella oxytoca class, n(%) | 2 (0.38) | 0 (0.00) | 2 (0.43) | - | 1.000 |
| Klebsiella variicola class, n(%) | 1 (0.19) | 0 (0.00) | 1 (0.22) | - | 1.000 |
| Legionella pneumophila class, n(%) | 3 (0.57) | 0 (0.00) | 3 (0.65) | - | 1.000 |
| Measles virus class, n(%) | 1 (0.19) | 0 (0.00) | 1 (0.22) | - | 1.000 |
| MRSA class, n(%) | 1 (0.19) | 0 (0.00) | 1 (0.22) | - | 1.000 |
| MRSA resistance gene class, n(%) | 3 (0.57) | 0 (0.00) | 3 (0.65) | - | 1.000 |
| Neisseria meningitidis class, n(%) | 1 (0.19) | 0 (0.00) | 1 (0.22) | - | 1.000 |
| Parvimonas micra class, n(%) | 2 (0.38) | 0 (0.00) | 2 (0.43) | - | 1.000 |
| Pseudomonas aeruginosa class, n(%) | 6 (1.14) | 0 (0.00) | 6 (1.30) | - | 1.000 |
| Rhinovirus B class, n(%) | 9 (1.71) | 1 (1.54) | 8 (1.74) | χ²=0.00 | 1.000 |
| Rhinovirus class, n(%) | 4 (0.76) | 0 (0.00) | 4 (0.87) | - | 1.000 |
| Streptococcus agalactiae class, n(%) | 1 (0.19) | 0 (0.00) | 1 (0.22) | - | 1.000 |
| Streptococcus anginosus group class, n(%) | 11 (2.09) | 1 (1.54) | 10 (2.17) | χ²=0.00 | 1.000 |
| Streptococcus pyogenes class, n(%) | 2 (0.38) | 0 (0.00) | 2 (0.43) | - | 1.000 |
| Ureaplasma parvum class, n(%) | 1 (0.19) | 0 (0.00) | 1 (0.22) | - | 1.000 |
| Varicella zoster virus class, n(%) | 1 (0.19) | 0 (0.00) | 1 (0.22) | - | 1.000 |
| WU polyomavirus class, n(%) | 4 (0.76) | 0 (0.00) | 4 (0.87) | - | 1.000 |

Note: tNGS, targeted next-generation sequencing; EBV, Epstein-Barr virus; HSV1, Herpes simplex virus type 1; MRSA, Methicillin-resistant Staphylococcus aureus; RSV, Respiratory Syncytial Virus. The threshold for statistical significance is P-values < 0.05.

Supplementary Table 7. Univariate and Multivariate Logistic Regression Estimating the Effect of Co-detected Pathogens Pathogens on Intensive Care Unit Admission Risk

|  | Univariate | | | | | Multivariate | | | | |
| --- | --- | --- | --- | --- | --- | --- | --- | --- | --- | --- |
| Variables | **β** | **S.E** | **Z** | **P-values** | **OR (95%CI)** | **β** | **S.E** | **Z** | **P-values** | **OR (95%CI)** |
| Acinetobacter baumannii class | 0.75 | 0.49 | 1.51 | 0.131 | 2.11 (0.80 ~ 5.57) |  |  |  |  |  |
| Acinetobacter calcoaceticus baumannii complex class | 15.27 | 535.41 | 0.03 | 0.977 | 4271356.01 (0.00 ~ Inf) |  |  |  |  |  |
| Bordetella parapertussis class | -11.88 | 535.41 | -0.02 | 0.982 | 0.00 (0.00 ~ Inf) |  |  |  |  |  |
| Bordetella pertussis class | 1.14 | 0.57 | 2.00 | 0.045 | 3.14 (1.02 ~ 9.62) | 0.91 | 0.70 | 1.31 | 0.190 | 2.49 (0.64 ~ 9.71) |
| Burkholderia cepacia complex class | -11.88 | 535.41 | -0.02 | 0.982 | 0.00 (0.00 ~ Inf) |  |  |  |  |  |
| Candida albicans class | 1.03 | 0.36 | 2.86 | 0.004 | 2.80 (1.38 ~ 5.67) | 0.93 | 0.40 | 2.31 | 0.021 | 2.54 (1.15 ~ 5.60) |
| Candida krusei class | -12.88 | 624.19 | -0.02 | 0.984 | 0.00 (0.00 ~ Inf) |  |  |  |  |  |
| Candida parapsilosis class | -0.40 | 1.07 | -0.37 | 0.710 | 0.67 (0.08 ~ 5.45) |  |  |  |  |  |
| Candida tropicalis class | -14.90 | 692.69 | -0.02 | 0.983 | 0.00 (0.00 ~ Inf) |  |  |  |  |  |
| Coxsackievirus A10 class | 1.70 | 1.42 | 1.20 | 0.231 | 5.47 (0.34 ~ 88.33) |  |  |  |  |  |
| Coxsackievirus A16 class | -11.88 | 535.41 | -0.02 | 0.982 | 0.00 (0.00 ~ Inf) |  |  |  |  |  |
| Coxsackievirus A6 class | -11.88 | 535.41 | -0.02 | 0.982 | 0.00 (0.00 ~ Inf) |  |  |  |  |  |
| Cytomegalovirus class | -0.81 | 0.61 | -1.32 | 0.186 | 0.44 (0.13 ~ 1.48) |  |  |  |  |  |
| EBV class | -0.51 | 0.54 | -0.94 | 0.345 | 0.60 (0.21 ~ 1.73) |  |  |  |  |  |
| Enterococcus faecium class | -11.88 | 535.41 | -0.02 | 0.982 | 0.00 (0.00 ~ Inf) |  |  |  |  |  |
| Enterovirus A class | -12.88 | 624.19 | -0.02 | 0.984 | 0.00 (0.00 ~ Inf) |  |  |  |  |  |
| Enterovirus B class | 15.27 | 535.41 | 0.03 | 0.977 | 4271356.01 (0.00 ~ Inf) |  |  |  |  |  |
| Enterovirus D68 class | 1.70 | 1.42 | 1.20 | 0.231 | 5.47 (0.34 ~ 88.33) |  |  |  |  |  |
| Escherichia coli class | -14.90 | 848.37 | -0.02 | 0.986 | 0.00 (0.00 ~ Inf) |  |  |  |  |  |
| Fusobacterium nucleatum class | -0.92 | 0.34 | -2.69 | 0.007 | 0.40 (0.20 ~ 0.78) | -0.83 | 0.36 | -2.31 | 0.021 | 0.43 (0.21 ~ 0.88) |
| Haemophilus haemolyticus class | 1.00 | 1.23 | 0.82 | 0.415 | 2.73 (0.24 ~ 30.44) |  |  |  |  |  |
| Haemophilus influenzae class | -0.33 | 0.25 | -1.32 | 0.186 | 0.72 (0.44 ~ 1.17) |  |  |  |  |  |
| HSV1 class | 1.50 | 0.68 | 2.21 | 0.027 | 4.50 (1.18 ~ 17.14) | 1.52 | 0.71 | 2.15 | 0.031 | 4.57 (1.15 ~ 18.20) |
| Human adenovirus 2 class | -11.88 | 535.41 | -0.02 | 0.982 | 0.00 (0.00 ~ Inf) |  |  |  |  |  |
| Human adenovirus 3 class | 0.08 | 1.10 | 0.07 | 0.942 | 1.08 (0.13 ~ 9.40) |  |  |  |  |  |
| Human adenovirus 5 class | -12.88 | 624.19 | -0.02 | 0.984 | 0.00 (0.00 ~ Inf) |  |  |  |  |  |
| Human adenovirus 57 class | -11.88 | 535.41 | -0.02 | 0.982 | 0.00 (0.00 ~ Inf) |  |  |  |  |  |
| Human adenovirus 7 class | -11.88 | 535.41 | -0.02 | 0.982 | 0.00 (0.00 ~ Inf) |  |  |  |  |  |
| Human adenovirus B class | -12.88 | 624.19 | -0.02 | 0.984 | 0.00 (0.00 ~ Inf) |  |  |  |  |  |
| Human adenovirus C class | -13.88 | 840.27 | -0.02 | 0.987 | 0.00 (0.00 ~ Inf) |  |  |  |  |  |
| Human bocavirus 1 class | 1.14 | 0.57 | 2.00 | 0.045 | 3.14 (1.02 ~ 9.62) | 0.83 | 0.64 | 1.30 | 0.194 | 2.28 (0.66 ~ 7.94) |
| Human coronavirus 229E class | -11.88 | 535.41 | -0.02 | 0.982 | 0.00 (0.00 ~ Inf) |  |  |  |  |  |
| Human coronavirus HKU1 class | -13.89 | 727.70 | -0.02 | 0.985 | 0.00 (0.00 ~ Inf) |  |  |  |  |  |
| Human coronavirus OC43 class | -12.88 | 624.19 | -0.02 | 0.984 | 0.00 (0.00 ~ Inf) |  |  |  |  |  |
| Human herpesvirus 4 class | 1.70 | 1.42 | 1.20 | 0.231 | 5.47 (0.34 ~ 88.33) |  |  |  |  |  |
| Human herpesvirus 5 class | 2.66 | 0.85 | 3.15 | 0.002 | 14.35 (2.74 ~ 75.29) | 2.28 | 0.88 | 2.59 | 0.010 | 9.74 (1.74 ~ 54.52) |
| Human herpesvirus 6 class | -13.89 | 727.70 | -0.02 | 0.985 | 0.00 (0.00 ~ Inf) |  |  |  |  |  |
| Human herpesvirus 6B class | 0.31 | 1.12 | 0.27 | 0.785 | 1.36 (0.15 ~ 12.29) |  |  |  |  |  |
| Human herpesvirus 7 class | 1.03 | 0.62 | 1.65 | 0.100 | 2.79 (0.82 ~ 9.51) | 1.09 | 0.67 | 1.63 | 0.104 | 2.97 (0.80 ~ 11.00) |
| Human parainfluenza virus 1 class | 0.60 | 1.16 | 0.51 | 0.608 | 1.81 (0.19 ~ 17.66) |  |  |  |  |  |
| Human parainfluenza virus 3 class | -1.17 | 1.04 | -1.13 | 0.258 | 0.31 (0.04 ~ 2.36) |  |  |  |  |  |
| Human RSV A class | -13.89 | 594.16 | -0.02 | 0.981 | 0.00 (0.00 ~ Inf) |  |  |  |  |  |
| Human RSV B class | -14.90 | 799.85 | -0.02 | 0.985 | 0.00 (0.00 ~ Inf) |  |  |  |  |  |
| Influenza A H1N1 2009 class | -11.88 | 535.41 | -0.02 | 0.982 | 0.00 (0.00 ~ Inf) |  |  |  |  |  |
| Influenza A H3N2 class | -11.88 | 535.41 | -0.02 | 0.982 | 0.00 (0.00 ~ Inf) |  |  |  |  |  |
| Influenza B Victoria class | 0.31 | 1.12 | 0.27 | 0.785 | 1.36 (0.15 ~ 12.29) |  |  |  |  |  |
| Influenza C virus class | 16.28 | 624.19 | 0.03 | 0.979 | 11755898.87 (0.00 ~ Inf) |  |  |  |  |  |
| Klebsiella aerogenes class | 2.82 | 1.16 | 2.43 | 0.015 | 16.82 (1.73 ~ 163.78) | 3.36 | 1.26 | 2.67 | 0.008 | 28.69 (2.44 ~ 337.87) |
| Klebsiella oxytoca class | -12.88 | 624.19 | -0.02 | 0.984 | 0.00 (0.00 ~ Inf) |  |  |  |  |  |
| Klebsiella pneumoniae class | 0.63 | 0.49 | 1.28 | 0.200 | 1.87 (0.72 ~ 4.86) |  |  |  |  |  |
| Klebsiella variicola class | -11.88 | 535.41 | -0.02 | 0.982 | 0.00 (0.00 ~ Inf) |  |  |  |  |  |
| Legionella pneumophila class | 17.29 | 840.27 | 0.02 | 0.984 | 32360365.94 (0.00 ~ Inf) |  |  |  |  |  |
| Macrolide antibiotics class | -1.97 | 1.02 | -1.93 | 0.054 | 0.14 (0.02 ~ 1.04) | -1.79 | 1.04 | -1.71 | 0.087 | 0.17 (0.02 ~ 1.29) |
| Measles virus class | -11.88 | 535.41 | -0.02 | 0.982 | 0.00 (0.00 ~ Inf) |  |  |  |  |  |
| Moraxella catarrhalis class | 0.03 | 0.31 | 0.11 | 0.914 | 1.03 (0.56 ~ 1.90) |  |  |  |  |  |
| MRSA class | 15.27 | 535.41 | 0.03 | 0.977 | 4271356.01 (0.00 ~ Inf) |  |  |  |  |  |
| MRSA resistance gene class | -13.88 | 840.27 | -0.02 | 0.987 | 0.00 (0.00 ~ Inf) |  |  |  |  |  |
| Mycoplasma pneumoniae class | -0.53 | 0.42 | -1.28 | 0.202 | 0.59 (0.26 ~ 1.33) |  |  |  |  |  |
| Neisseria meningitidis class | 15.27 | 535.41 | 0.03 | 0.977 | 4271356.01 (0.00 ~ Inf) |  |  |  |  |  |
| Parvimonas micra class | -12.88 | 624.19 | -0.02 | 0.984 | 0.00 (0.00 ~ Inf) |  |  |  |  |  |
| Pneumocystis jirovecii class | 0.60 | 0.83 | 0.73 | 0.466 | 1.83 (0.36 ~ 9.20) |  |  |  |  |  |
| Pseudomonas aeruginosa class | 1.01 | 0.87 | 1.16 | 0.247 | 2.75 (0.50 ~ 15.27) |  |  |  |  |  |
| Rhinovirus A class | 0.27 | 0.41 | 0.64 | 0.521 | 1.30 (0.58 ~ 2.93) |  |  |  |  |  |
| Rhinovirus B class | -14.90 | 799.85 | -0.02 | 0.985 | 0.00 (0.00 ~ Inf) |  |  |  |  |  |
| Rhinovirus C class | -0.22 | 0.63 | -0.34 | 0.731 | 0.81 (0.23 ~ 2.77) |  |  |  |  |  |
| Rhinovirus class | -13.89 | 727.70 | -0.02 | 0.985 | 0.00 (0.00 ~ Inf) |  |  |  |  |  |
| SARS CoV 2 class | -13.88 | 840.27 | -0.02 | 0.987 | 0.00 (0.00 ~ Inf) |  |  |  |  |  |
| Staphylococcus aureus class | 0.37 | 0.35 | 1.06 | 0.288 | 1.45 (0.73 ~ 2.87) |  |  |  |  |  |
| Stenotrophomonas maltophilia class | 15.27 | 535.41 | 0.03 | 0.977 | 4271356.01 (0.00 ~ Inf) |  |  |  |  |  |
| Streptococcus agalactiae class | -11.88 | 535.41 | -0.02 | 0.982 | 0.00 (0.00 ~ Inf) |  |  |  |  |  |
| Streptococcus anginosus group class | 0.19 | 0.79 | 0.24 | 0.811 | 1.21 (0.26 ~ 5.69) |  |  |  |  |  |
| Streptococcus intermedius class | 0.53 | 0.40 | 1.33 | 0.185 | 1.70 (0.78 ~ 3.73) |  |  |  |  |  |
| Streptococcus mitis group class | -1.32 | 0.74 | -1.79 | 0.073 | 0.27 (0.06 ~ 1.13) | -1.53 | 0.81 | -1.89 | 0.058 | 0.22 (0.04 ~ 1.05) |
| Streptococcus pneumoniae class | 0.24 | 0.26 | 0.92 | 0.359 | 1.27 (0.76 ~ 2.10) |  |  |  |  |  |
| Streptococcus pyogenes class | -12.88 | 624.19 | -0.02 | 0.984 | 0.00 (0.00 ~ Inf) |  |  |  |  |  |
| Tropheryma whipplei class | 2.16 | 0.66 | 3.29 | 0.001 | 8.68 (2.39 ~ 31.50) | 2.21 | 0.70 | 3.17 | 0.002 | 9.12 (2.32 ~ 35.82) |
| Ureaplasma parvum class | 15.27 | 535.41 | 0.03 | 0.977 | 4271356.01 (0.00 ~ Inf) |  |  |  |  |  |
| Varicella zoster virus class | 15.27 | 535.41 | 0.03 | 0.977 | 4271356.01 (0.00 ~ Inf) |  |  |  |  |  |
| WU polyomavirus class | -13.89 | 727.70 | -0.02 | 0.985 | 0.00 (0.00 ~ Inf) |  |  |  |  |  |

Note: OR, Odd Ratio; CI: Confidence Interval; EBV, Epstein-Barr virus; HSV1, Herpes simplex virus type 1; MRSA, Methicillin-resistant Staphylococcus aureus; RSV, Respiratory Syncytial Virus; SARS-CoV-2, Severe Acute Respiratory Syndrome Coronavirus 2. Pathogens with P<0.1 in univariate logistic regression were enrolled in multivariate logistic regression. The threshold for statistical significance is P-values < 0.05.

Supplementary Table 8. Univariate and Multivariate Logistic Regression Estimating the Effect of Co-detected Pathogens Pathogens on Invasive Ventilation Risk

| Variables | β | S.E | Z | P-values | OR (95%CI) | β | S.E | Z | P-values | OR (95%CI) |
| --- | --- | --- | --- | --- | --- | --- | --- | --- | --- | --- |
| Acinetobacter baumannii class | -0.10 | 0.76 | -0.13 | 0.898 | 0.91 (0.21 ~ 4.00) |  |  |  |  |  |
| Acinetobacter calcoaceticus baumannii complex class | 16.80 | 882.74 | 0.02 | 0.985 | 19686613.91 (0.00 ~ Inf) |  |  |  |  |  |
| Bordetella parapertussis class | -12.36 | 882.74 | -0.01 | 0.989 | 0.00 (0.00 ~ Inf) |  |  |  |  |  |
| Bordetella pertussis class | 1.70 | 0.58 | 2.95 | 0.003 | 5.50 (1.77 ~ 17.08) | 1.39 | 0.66 | 2.12 | 0.034 | 4.02 (1.11 ~ 14.53) |
| Burkholderia cepacia complex class | -12.36 | 882.74 | -0.01 | 0.989 | 0.00 (0.00 ~ Inf) |  |  |  |  |  |
| Candida albicans class | 0.70 | 0.44 | 1.58 | 0.115 | 2.01 (0.84 ~ 4.80) |  |  |  |  |  |
| Candida krusei class | -12.36 | 624.19 | -0.02 | 0.984 | 0.00 (0.00 ~ Inf) |  |  |  |  |  |
| Candida parapsilosis class | 0.13 | 1.07 | 0.12 | 0.901 | 1.14 (0.14 ~ 9.32) |  |  |  |  |  |
| Candida tropicalis class | -14.38 | 692.69 | -0.02 | 0.983 | 0.00 (0.00 ~ Inf) |  |  |  |  |  |
| Coxsackievirus A10 class | -12.36 | 624.19 | -0.02 | 0.984 | 0.00 (0.00 ~ Inf) |  |  |  |  |  |
| Coxsackievirus A16 class | -12.36 | 882.74 | -0.01 | 0.989 | 0.00 (0.00 ~ Inf) |  |  |  |  |  |
| Coxsackievirus A6 class | -12.36 | 882.74 | -0.01 | 0.989 | 0.00 (0.00 ~ Inf) |  |  |  |  |  |
| Cytomegalovirus class | -0.72 | 0.74 | -0.97 | 0.332 | 0.49 (0.11 ~ 2.08) |  |  |  |  |  |
| EBV class | -0.75 | 0.74 | -1.01 | 0.312 | 0.47 (0.11 ~ 2.02) |  |  |  |  |  |
| Enterococcus faecium class | -12.36 | 882.74 | -0.01 | 0.989 | 0.00 (0.00 ~ Inf) |  |  |  |  |  |
| Enterovirus A class | -12.36 | 624.19 | -0.02 | 0.984 | 0.00 (0.00 ~ Inf) |  |  |  |  |  |
| Enterovirus B class | -12.36 | 882.74 | -0.01 | 0.989 | 0.00 (0.00 ~ Inf) |  |  |  |  |  |
| Enterovirus D68 class | -12.36 | 624.19 | -0.02 | 0.984 | 0.00 (0.00 ~ Inf) |  |  |  |  |  |
| Escherichia coli class | -14.37 | 848.37 | -0.02 | 0.986 | 0.00 (0.00 ~ Inf) |  |  |  |  |  |
| Fusobacterium nucleatum class | -1.05 | 0.45 | -2.36 | 0.018 | 0.35 (0.15 ~ 0.84) | -0.92 | 0.46 | -1.99 | 0.046 | 0.40 (0.16 ~ 0.99) |
| Haemophilus haemolyticus class | -13.36 | 840.27 | -0.02 | 0.987 | 0.00 (0.00 ~ Inf) |  |  |  |  |  |
| Haemophilus influenzae class | -0.64 | 0.32 | -2.00 | 0.045 | 0.53 (0.28 ~ 0.99) | -0.60 | 0.33 | -1.80 | 0.073 | 0.55 (0.28 ~ 1.06) |
| HSV1 class | 1.56 | 0.72 | 2.16 | 0.031 | 4.78 (1.16 ~ 19.69) | 1.55 | 0.76 | 2.03 | 0.042 | 4.71 (1.06 ~ 21.01) |
| Human adenovirus 2 class | -12.36 | 882.74 | -0.01 | 0.989 | 0.00 (0.00 ~ Inf) |  |  |  |  |  |
| Human adenovirus 3 class | -14.37 | 979.61 | -0.01 | 0.988 | 0.00 (0.00 ~ Inf) |  |  |  |  |  |
| Human adenovirus 5 class | -12.36 | 624.19 | -0.02 | 0.984 | 0.00 (0.00 ~ Inf) |  |  |  |  |  |
| Human adenovirus 57 class | -12.36 | 882.74 | -0.01 | 0.989 | 0.00 (0.00 ~ Inf) |  |  |  |  |  |
| Human adenovirus 7 class | -12.36 | 882.74 | -0.01 | 0.989 | 0.00 (0.00 ~ Inf) |  |  |  |  |  |
| Human adenovirus B class | -12.36 | 624.19 | -0.02 | 0.984 | 0.00 (0.00 ~ Inf) |  |  |  |  |  |
| Human adenovirus C class | -13.36 | 840.27 | -0.02 | 0.987 | 0.00 (0.00 ~ Inf) |  |  |  |  |  |
| Human bocavirus 1 class | 0.43 | 0.78 | 0.55 | 0.579 | 1.54 (0.34 ~ 7.08) |  |  |  |  |  |
| Human coronavirus 229E class | -12.36 | 882.74 | -0.01 | 0.989 | 0.00 (0.00 ~ Inf) |  |  |  |  |  |
| Human coronavirus HKU1 class | -13.36 | 727.70 | -0.02 | 0.985 | 0.00 (0.00 ~ Inf) |  |  |  |  |  |
| Human coronavirus OC43 class | -12.36 | 624.19 | -0.02 | 0.984 | 0.00 (0.00 ~ Inf) |  |  |  |  |  |
| Human herpesvirus 4 class | -12.36 | 624.19 | -0.02 | 0.984 | 0.00 (0.00 ~ Inf) |  |  |  |  |  |
| Human herpesvirus 5 class | 1.97 | 0.78 | 2.54 | 0.011 | 7.19 (1.56 ~ 33.08) | 1.89 | 0.80 | 2.36 | 0.018 | 6.65 (1.37 ~ 32.14) |
| Human herpesvirus 6 class | -13.36 | 727.70 | -0.02 | 0.985 | 0.00 (0.00 ~ Inf) |  |  |  |  |  |
| Human herpesvirus 6B class | -13.37 | 650.87 | -0.02 | 0.984 | 0.00 (0.00 ~ Inf) |  |  |  |  |  |
| Human herpesvirus 7 class | 1.15 | 0.68 | 1.69 | 0.092 | 3.16 (0.83 ~ 12.07) | 1.35 | 0.74 | 1.82 | 0.069 | 3.85 (0.90 ~ 16.45) |
| Human parainfluenza virus 1 class | -13.36 | 727.70 | -0.02 | 0.985 | 0.00 (0.00 ~ Inf) |  |  |  |  |  |
| Human parainfluenza virus 3 class | -0.64 | 1.04 | -0.62 | 0.538 | 0.53 (0.07 ~ 4.04) |  |  |  |  |  |
| Human RSV A class | -14.37 | 979.61 | -0.01 | 0.988 | 0.00 (0.00 ~ Inf) |  |  |  |  |  |
| Human RSV B class | -14.38 | 799.85 | -0.02 | 0.986 | 0.00 (0.00 ~ Inf) |  |  |  |  |  |
| Influenza A H1N1 2009 class | -12.36 | 882.74 | -0.01 | 0.989 | 0.00 (0.00 ~ Inf) |  |  |  |  |  |
| Influenza A H3N2 class | -12.36 | 882.74 | -0.01 | 0.989 | 0.00 (0.00 ~ Inf) |  |  |  |  |  |
| Influenza B Victoria class | -13.37 | 650.87 | -0.02 | 0.984 | 0.00 (0.00 ~ Inf) |  |  |  |  |  |
| Influenza C virus class | 16.82 | 624.19 | 0.03 | 0.979 | 20080346.19 (0.00 ~ Inf) |  |  |  |  |  |
| Klebsiella aerogenes class | 2.24 | 1.01 | 2.22 | 0.026 | 9.44 (1.30 ~ 68.48) | 2.28 | 1.03 | 2.23 | 0.026 | 9.79 (1.31 ~ 73.08) |
| Klebsiella oxytoca class | -12.36 | 624.19 | -0.02 | 0.984 | 0.00 (0.00 ~ Inf) |  |  |  |  |  |
| Klebsiella pneumoniae class | -0.96 | 1.03 | -0.93 | 0.354 | 0.38 (0.05 ~ 2.91) |  |  |  |  |  |
| Klebsiella variicola class | -12.36 | 882.74 | -0.01 | 0.989 | 0.00 (0.00 ~ Inf) |  |  |  |  |  |
| Legionella pneumophila class | 17.84 | 840.27 | 0.02 | 0.983 | 55698026.44 (0.00 ~ Inf) |  |  |  |  |  |
| Macrolide antibiotics class | -15.44 | 650.39 | -0.02 | 0.981 | 0.00 (0.00 ~ Inf) |  |  |  |  |  |
| Measles virus class | -12.36 | 882.74 | -0.01 | 0.989 | 0.00 (0.00 ~ Inf) |  |  |  |  |  |
| Moraxella catarrhalis class | -0.56 | 0.45 | -1.24 | 0.215 | 0.57 (0.24 ~ 1.38) |  |  |  |  |  |
| MRSA class | -12.36 | 882.74 | -0.01 | 0.989 | 0.00 (0.00 ~ Inf) |  |  |  |  |  |
| MRSA resistance gene class | -13.36 | 840.27 | -0.02 | 0.987 | 0.00 (0.00 ~ Inf) |  |  |  |  |  |
| Mycoplasma pneumoniae class | -0.37 | 0.49 | -0.75 | 0.456 | 0.69 (0.27 ~ 1.81) |  |  |  |  |  |
| Neisseria meningitidis class | -12.36 | 882.74 | -0.01 | 0.989 | 0.00 (0.00 ~ Inf) |  |  |  |  |  |
| Parvimonas micra class | -12.36 | 624.19 | -0.02 | 0.984 | 0.00 (0.00 ~ Inf) |  |  |  |  |  |
| Pneumocystis jirovecii class | 0.27 | 1.08 | 0.25 | 0.803 | 1.31 (0.16 ~ 10.85) |  |  |  |  |  |
| Pseudomonas aeruginosa class | 1.55 | 0.88 | 1.76 | 0.078 | 4.70 (0.84 ~ 26.31) | 0.79 | 1.08 | 0.73 | 0.464 | 2.21 (0.26 ~ 18.51) |
| Rhinovirus A class | -0.04 | 0.55 | -0.08 | 0.935 | 0.96 (0.33 ~ 2.79) |  |  |  |  |  |
| Rhinovirus B class | -14.38 | 799.85 | -0.02 | 0.986 | 0.00 (0.00 ~ Inf) |  |  |  |  |  |
| Rhinovirus C class | -15.41 | 824.92 | -0.02 | 0.985 | 0.00 (0.00 ~ Inf) |  |  |  |  |  |
| Rhinovirus class | -13.36 | 727.70 | -0.02 | 0.985 | 0.00 (0.00 ~ Inf) |  |  |  |  |  |
| SARS CoV 2 class | -13.36 | 840.27 | -0.02 | 0.987 | 0.00 (0.00 ~ Inf) |  |  |  |  |  |
| Staphylococcus aureus class | -0.19 | 0.49 | -0.38 | 0.700 | 0.83 (0.32 ~ 2.17) |  |  |  |  |  |
| Stenotrophomonas maltophilia class | 16.80 | 882.74 | 0.02 | 0.985 | 19686613.91 (0.00 ~ Inf) |  |  |  |  |  |
| Streptococcus agalactiae class | -12.36 | 882.74 | -0.01 | 0.989 | 0.00 (0.00 ~ Inf) |  |  |  |  |  |
| Streptococcus anginosus group class | -0.09 | 1.06 | -0.09 | 0.929 | 0.91 (0.11 ~ 7.25) |  |  |  |  |  |
| Streptococcus intermedius class | 0.56 | 0.47 | 1.18 | 0.237 | 1.74 (0.69 ~ 4.38) |  |  |  |  |  |
| Streptococcus mitis group class | -15.44 | 625.53 | -0.02 | 0.980 | 0.00 (0.00 ~ Inf) |  |  |  |  |  |
| Streptococcus pneumoniae class | 0.01 | 0.32 | 0.02 | 0.981 | 1.01 (0.54 ~ 1.90) |  |  |  |  |  |
| Streptococcus pyogenes class | -12.36 | 624.19 | -0.02 | 0.984 | 0.00 (0.00 ~ Inf) |  |  |  |  |  |
| Tropheryma whipplei class | 1.41 | 0.71 | 1.99 | 0.046 | 4.08 (1.02 ~ 16.30) | 1.50 | 0.78 | 1.92 | 0.055 | 4.50 (0.97 ~ 20.85) |
| Ureaplasma parvum class | -12.36 | 882.74 | -0.01 | 0.989 | 0.00 (0.00 ~ Inf) |  |  |  |  |  |
| Varicella zoster virus class | -12.36 | 882.74 | -0.01 | 0.989 | 0.00 (0.00 ~ Inf) |  |  |  |  |  |
| WU polyomavirus class | -13.36 | 727.70 | -0.02 | 0.985 | 0.00 (0.00 ~ Inf) |  |  |  |  |  |

Note: OR, Odd Ratio; CI: Confidence Interval; EBV, Epstein-Barr virus; HSV1, Herpes simplex virus type 1; MRSA, Methicillin-resistant Staphylococcus aureus; RSV, Respiratory Syncytial Virus; SARS-CoV-2, Severe Acute Respiratory Syndrome Coronavirus 2. Pathogens with P<0.1 in univariate logistic regression were enrolled in multivariate logistic regression. The threshold for statistical significance is P-values < 0.05.

Supplementary Table 9. Univariate and Multivariate Logistic Regression Estimating the Effect of Co-detected Pathogens Pathogens on Noninvasive Ventilation Risk

| Variables | β | S.E | Z | P-values | OR (95%CI) | β | S.E | Z | P-values | OR (95%CI) |
| --- | --- | --- | --- | --- | --- | --- | --- | --- | --- | --- |
| Acinetobacter baumannii class | -0.53 | 0.75 | -0.70 | 0.484 | 0.59 (0.14 ~ 2.58) |  |  |  |  |  |
| Acinetobacter calcoaceticus baumannii complex class | -12.77 | 882.74 | -0.01 | 0.988 | 0.00 (0.00 ~ Inf) |  |  |  |  |  |
| Bordetella parapertussis class | -12.77 | 882.74 | -0.01 | 0.988 | 0.00 (0.00 ~ Inf) |  |  |  |  |  |
| Bordetella pertussis class | 1.26 | 0.57 | 2.19 | 0.028 | 3.51 (1.14 ~ 10.77) | 1.20 | 0.67 | 1.78 | 0.076 | 3.31 (0.88 ~ 12.43) |
| Burkholderia cepacia complex class | -12.77 | 882.74 | -0.01 | 0.988 | 0.00 (0.00 ~ Inf) |  |  |  |  |  |
| Candida albicans class | 0.88 | 0.38 | 2.33 | 0.020 | 2.41 (1.15 ~ 5.05) | 0.69 | 0.41 | 1.66 | 0.096 | 1.99 (0.88 ~ 4.47) |
| Candida krusei class | -12.78 | 624.19 | -0.02 | 0.984 | 0.00 (0.00 ~ Inf) |  |  |  |  |  |
| Candida parapsilosis class | -0.29 | 1.07 | -0.27 | 0.786 | 0.75 (0.09 ~ 6.07) |  |  |  |  |  |
| Candida tropicalis class | -14.80 | 692.69 | -0.02 | 0.983 | 0.00 (0.00 ~ Inf) |  |  |  |  |  |
| Coxsackievirus A10 class | 1.81 | 1.42 | 1.27 | 0.204 | 6.08 (0.38 ~ 98.29) |  |  |  |  |  |
| Coxsackievirus A16 class | -12.77 | 882.74 | -0.01 | 0.988 | 0.00 (0.00 ~ Inf) |  |  |  |  |  |
| Coxsackievirus A6 class | -12.77 | 882.74 | -0.01 | 0.988 | 0.00 (0.00 ~ Inf) |  |  |  |  |  |
| Cytomegalovirus class | -0.70 | 0.61 | -1.14 | 0.253 | 0.50 (0.15 ~ 1.65) |  |  |  |  |  |
| EBV class | -0.73 | 0.61 | -1.19 | 0.233 | 0.48 (0.14 ~ 1.60) |  |  |  |  |  |
| Enterococcus faecium class | -12.77 | 882.74 | -0.01 | 0.988 | 0.00 (0.00 ~ Inf) |  |  |  |  |  |
| Enterovirus A class | -12.78 | 624.19 | -0.02 | 0.984 | 0.00 (0.00 ~ Inf) |  |  |  |  |  |
| Enterovirus B class | 16.37 | 882.74 | 0.02 | 0.985 | 12909448.24 (0.00 ~ Inf) |  |  |  |  |  |
| Enterovirus D68 class | 1.81 | 1.42 | 1.27 | 0.204 | 6.08 (0.38 ~ 98.29) |  |  |  |  |  |
| Escherichia coli class | -14.79 | 848.37 | -0.02 | 0.986 | 0.00 (0.00 ~ Inf) |  |  |  |  |  |
| Fusobacterium nucleatum class | -0.68 | 0.33 | -2.04 | 0.041 | 0.51 (0.26 ~ 0.97) | -0.45 | 0.34 | -1.32 | 0.186 | 0.64 (0.32 ~ 1.24) |
| Haemophilus haemolyticus class | -13.78 | 840.27 | -0.02 | 0.987 | 0.00 (0.00 ~ Inf) |  |  |  |  |  |
| Haemophilus influenzae class | -0.29 | 0.26 | -1.14 | 0.255 | 0.75 (0.45 ~ 1.24) |  |  |  |  |  |
| HSV1 class | 1.61 | 0.68 | 2.36 | 0.018 | 5.03 (1.32 ~ 19.16) | 1.75 | 0.69 | 2.54 | 0.011 | 5.76 (1.49 ~ 22.26) |
| Human adenovirus 2 class | -12.77 | 882.74 | -0.01 | 0.988 | 0.00 (0.00 ~ Inf) |  |  |  |  |  |
| Human adenovirus 3 class | 0.19 | 1.10 | 0.17 | 0.865 | 1.21 (0.14 ~ 10.46) |  |  |  |  |  |
| Human adenovirus 5 class | -12.78 | 624.19 | -0.02 | 0.984 | 0.00 (0.00 ~ Inf) |  |  |  |  |  |
| Human adenovirus 57 class | -12.77 | 882.74 | -0.01 | 0.988 | 0.00 (0.00 ~ Inf) |  |  |  |  |  |
| Human adenovirus 7 class | -12.77 | 882.74 | -0.01 | 0.988 | 0.00 (0.00 ~ Inf) |  |  |  |  |  |
| Human adenovirus B class | -12.78 | 624.19 | -0.02 | 0.984 | 0.00 (0.00 ~ Inf) |  |  |  |  |  |
| Human adenovirus C class | -13.78 | 840.27 | -0.02 | 0.987 | 0.00 (0.00 ~ Inf) |  |  |  |  |  |
| Human bocavirus 1 class | 1.26 | 0.57 | 2.19 | 0.028 | 3.51 (1.14 ~ 10.77) | 1.04 | 0.62 | 1.69 | 0.092 | 2.83 (0.84 ~ 9.46) |
| Human coronavirus 229E class | -12.77 | 882.74 | -0.01 | 0.988 | 0.00 (0.00 ~ Inf) |  |  |  |  |  |
| Human coronavirus HKU1 class | -13.78 | 727.70 | -0.02 | 0.985 | 0.00 (0.00 ~ Inf) |  |  |  |  |  |
| Human coronavirus OC43 class | -12.78 | 624.19 | -0.02 | 0.984 | 0.00 (0.00 ~ Inf) |  |  |  |  |  |
| Human herpesvirus 4 class | 1.81 | 1.42 | 1.27 | 0.204 | 6.08 (0.38 ~ 98.29) |  |  |  |  |  |
| Human herpesvirus 5 class | 2.77 | 0.85 | 3.28 | 0.001 | 16.04 (3.05 ~ 84.26) | 2.43 | 0.88 | 2.76 | 0.006 | 11.35 (2.03 ~ 63.46) |
| Human herpesvirus 6 class | -13.78 | 727.70 | -0.02 | 0.985 | 0.00 (0.00 ~ Inf) |  |  |  |  |  |
| Human herpesvirus 6B class | -13.78 | 650.87 | -0.02 | 0.983 | 0.00 (0.00 ~ Inf) |  |  |  |  |  |
| Human herpesvirus 7 class | 0.72 | 0.68 | 1.06 | 0.291 | 2.05 (0.54 ~ 7.74) |  |  |  |  |  |
| Human parainfluenza virus 1 class | 0.70 | 1.16 | 0.60 | 0.546 | 2.02 (0.21 ~ 19.66) |  |  |  |  |  |
| Human parainfluenza virus 3 class | -14.81 | 565.58 | -0.03 | 0.979 | 0.00 (0.00 ~ Inf) |  |  |  |  |  |
| Human RSV A class | -13.79 | 594.16 | -0.02 | 0.981 | 0.00 (0.00 ~ Inf) |  |  |  |  |  |
| Human RSV B class | -0.29 | 1.07 | -0.27 | 0.786 | 0.75 (0.09 ~ 6.07) |  |  |  |  |  |
| Influenza A H1N1 2009 class | -12.77 | 882.74 | -0.01 | 0.988 | 0.00 (0.00 ~ Inf) |  |  |  |  |  |
| Influenza A H3N2 class | -12.77 | 882.74 | -0.01 | 0.988 | 0.00 (0.00 ~ Inf) |  |  |  |  |  |
| Influenza B Victoria class | 0.41 | 1.13 | 0.37 | 0.714 | 1.51 (0.17 ~ 13.70) |  |  |  |  |  |
| Influenza C virus class | 16.39 | 624.19 | 0.03 | 0.979 | 13086290.00 (0.00 ~ Inf) |  |  |  |  |  |
| Klebsiella aerogenes class | 0.70 | 1.16 | 0.60 | 0.546 | 2.02 (0.21 ~ 19.66) |  |  |  |  |  |
| Klebsiella oxytoca class | -12.78 | 624.19 | -0.02 | 0.984 | 0.00 (0.00 ~ Inf) |  |  |  |  |  |
| Klebsiella pneumoniae class | -0.16 | 0.63 | -0.25 | 0.801 | 0.85 (0.25 ~ 2.93) |  |  |  |  |  |
| Klebsiella variicola class | -12.77 | 882.74 | -0.01 | 0.988 | 0.00 (0.00 ~ Inf) |  |  |  |  |  |
| Legionella pneumophila class | 17.40 | 840.27 | 0.02 | 0.983 | 36066300.00 (0.00 ~ Inf) |  |  |  |  |  |
| Macrolide antibiotics class | -1.86 | 1.02 | -1.82 | 0.069 | 0.16 (0.02 ~ 1.15) | -1.84 | 1.05 | -1.74 | 0.082 | 0.16 (0.02 ~ 1.26) |
| Measles virus class | -12.77 | 882.74 | -0.01 | 0.988 | 0.00 (0.00 ~ Inf) |  |  |  |  |  |
| Moraxella catarrhalis class | -0.04 | 0.33 | -0.13 | 0.896 | 0.96 (0.50 ~ 1.82) |  |  |  |  |  |
| MRSA class | 16.37 | 882.74 | 0.02 | 0.985 | 12909448.24 (0.00 ~ Inf) |  |  |  |  |  |
| MRSA resistance gene class | -13.78 | 840.27 | -0.02 | 0.987 | 0.00 (0.00 ~ Inf) |  |  |  |  |  |
| Mycoplasma pneumoniae class | -0.42 | 0.42 | -1.00 | 0.319 | 0.66 (0.29 ~ 1.50) |  |  |  |  |  |
| Neisseria meningitidis class | 16.37 | 882.74 | 0.02 | 0.985 | 12909448.24 (0.00 ~ Inf) |  |  |  |  |  |
| Parvimonas micra class | -12.78 | 624.19 | -0.02 | 0.984 | 0.00 (0.00 ~ Inf) |  |  |  |  |  |
| Pneumocystis jirovecii class | -0.15 | 1.08 | -0.14 | 0.886 | 0.86 (0.10 ~ 7.07) |  |  |  |  |  |
| Pseudomonas aeruginosa class | 0.19 | 1.10 | 0.17 | 0.865 | 1.21 (0.14 ~ 10.46) |  |  |  |  |  |
| Rhinovirus A class | 0.20 | 0.43 | 0.46 | 0.642 | 1.22 (0.52 ~ 2.87) |  |  |  |  |  |
| Rhinovirus B class | -14.79 | 799.85 | -0.02 | 0.985 | 0.00 (0.00 ~ Inf) |  |  |  |  |  |
| Rhinovirus C class | -0.58 | 0.75 | -0.77 | 0.441 | 0.56 (0.13 ~ 2.44) |  |  |  |  |  |
| Rhinovirus class | -13.78 | 727.70 | -0.02 | 0.985 | 0.00 (0.00 ~ Inf) |  |  |  |  |  |
| SARS CoV 2 class | -13.78 | 840.27 | -0.02 | 0.987 | 0.00 (0.00 ~ Inf) |  |  |  |  |  |
| Staphylococcus aureus class | -0.07 | 0.40 | -0.16 | 0.871 | 0.94 (0.43 ~ 2.06) |  |  |  |  |  |
| Stenotrophomonas maltophilia class | 16.37 | 882.74 | 0.02 | 0.985 | 12909448.24 (0.00 ~ Inf) |  |  |  |  |  |
| Streptococcus agalactiae class | -12.77 | 882.74 | -0.01 | 0.988 | 0.00 (0.00 ~ Inf) |  |  |  |  |  |
| Streptococcus anginosus group class | 0.30 | 0.79 | 0.37 | 0.708 | 1.35 (0.28 ~ 6.35) |  |  |  |  |  |
| Streptococcus intermedius class | 0.48 | 0.42 | 1.15 | 0.250 | 1.62 (0.71 ~ 3.67) |  |  |  |  |  |
| Streptococcus mitis group class | -0.43 | 0.54 | -0.80 | 0.426 | 0.65 (0.22 ~ 1.88) |  |  |  |  |  |
| Streptococcus pneumoniae class | 0.25 | 0.27 | 0.95 | 0.340 | 1.29 (0.76 ~ 2.17) |  |  |  |  |  |
| Streptococcus pyogenes class | -12.78 | 624.19 | -0.02 | 0.984 | 0.00 (0.00 ~ Inf) |  |  |  |  |  |
| Tropheryma whipplei class | 1.43 | 0.66 | 2.17 | 0.030 | 4.18 (1.15 ~ 15.17) | 1.34 | 0.69 | 1.94 | 0.052 | 3.82 (0.99 ~ 14.76) |
| Ureaplasma parvum class | -12.77 | 882.74 | -0.01 | 0.988 | 0.00 (0.00 ~ Inf) |  |  |  |  |  |
| Varicella zoster virus class | 16.37 | 882.74 | 0.02 | 0.985 | 12909448.24 (0.00 ~ Inf) |  |  |  |  |  |
| WU polyomavirus class | -13.78 | 727.70 | -0.02 | 0.985 | 0.00 (0.00 ~ Inf) |  |  |  |  |  |

Note: OR, Odd Ratio; CI: Confidence Interval; EBV, Epstein-Barr virus; HSV1, Herpes simplex virus type 1; MRSA, Methicillin-resistant Staphylococcus aureus; RSV, Respiratory Syncytial Virus; SARS-CoV-2, Severe Acute Respiratory Syndrome Coronavirus 2. Pathogens with P<0.1 in univariate logistic regression were enrolled in multivariate logistic regression. The threshold for statistical significance is P-values < 0.05.

Supplementary Table 10. Univariate and Multivariate Logistic Regression Estimating the Effect of Co-detected Pathogens Pathogens on Sepsis Shock Risk

| Variables | β | S.E | Z | P-values | OR (95%CI) | β | S.E | Z | P-values | OR (95%CI) |
| --- | --- | --- | --- | --- | --- | --- | --- | --- | --- | --- |
| Acinetobacter baumannii class | -0.51 | 1.04 | -0.49 | 0.624 | 0.60 (0.08 ~ 4.59) |  |  |  |  |  |
| Acinetobacter calcoaceticus baumannii complex class | 17.15 | 882.74 | 0.02 | 0.985 | 27937076.46 (0.00 ~ Inf) |  |  |  |  |  |
| Bordetella parapertussis class | -12.02 | 882.74 | -0.01 | 0.989 | 0.00 (0.00 ~ Inf) |  |  |  |  |  |
| Bordetella pertussis class | 1.31 | 0.67 | 1.95 | 0.052 | 3.72 (0.99 ~ 13.94) | 0.87 | 0.82 | 1.06 | 0.288 | 2.39 (0.48 ~ 11.92) |
| Burkholderia cepacia complex class | -12.02 | 882.74 | -0.01 | 0.989 | 0.00 (0.00 ~ Inf) |  |  |  |  |  |
| Candida albicans class | 0.01 | 0.62 | 0.02 | 0.981 | 1.02 (0.30 ~ 3.45) |  |  |  |  |  |
| Candida krusei class | -13.02 | 1029.12 | -0.01 | 0.990 | 0.00 (0.00 ~ Inf) |  |  |  |  |  |
| Candida parapsilosis class | 0.48 | 1.07 | 0.45 | 0.653 | 1.62 (0.20 ~ 13.32) |  |  |  |  |  |
| Candida tropicalis class | -14.04 | 692.69 | -0.02 | 0.984 | 0.00 (0.00 ~ Inf) |  |  |  |  |  |
| Coxsackievirus A10 class | -13.02 | 1029.12 | -0.01 | 0.990 | 0.00 (0.00 ~ Inf) |  |  |  |  |  |
| Coxsackievirus A16 class | -12.02 | 882.74 | -0.01 | 0.989 | 0.00 (0.00 ~ Inf) |  |  |  |  |  |
| Coxsackievirus A6 class | -12.02 | 882.74 | -0.01 | 0.989 | 0.00 (0.00 ~ Inf) |  |  |  |  |  |
| Cytomegalovirus class | -0.36 | 0.75 | -0.48 | 0.630 | 0.70 (0.16 ~ 3.01) |  |  |  |  |  |
| EBV class | -16.10 | 1044.46 | -0.02 | 0.988 | 0.00 (0.00 ~ Inf) |  |  |  |  |  |
| Enterococcus faecium class | -12.02 | 882.74 | -0.01 | 0.989 | 0.00 (0.00 ~ Inf) |  |  |  |  |  |
| Enterovirus A class | -13.02 | 1029.12 | -0.01 | 0.990 | 0.00 (0.00 ~ Inf) |  |  |  |  |  |
| Enterovirus B class | -12.02 | 882.74 | -0.01 | 0.989 | 0.00 (0.00 ~ Inf) |  |  |  |  |  |
| Enterovirus D68 class | -13.02 | 1029.12 | -0.01 | 0.990 | 0.00 (0.00 ~ Inf) |  |  |  |  |  |
| Escherichia coli class | -14.03 | 848.37 | -0.02 | 0.987 | 0.00 (0.00 ~ Inf) |  |  |  |  |  |
| Fusobacterium nucleatum class | -0.45 | 0.43 | -1.05 | 0.292 | 0.64 (0.27 ~ 1.48) |  |  |  |  |  |
| Haemophilus haemolyticus class | -13.02 | 840.27 | -0.02 | 0.988 | 0.00 (0.00 ~ Inf) |  |  |  |  |  |
| Haemophilus influenzae class | -0.62 | 0.37 | -1.67 | 0.094 | 0.54 (0.26 ~ 1.11) | -0.59 | 0.38 | -1.57 | 0.117 | 0.55 (0.26 ~ 1.16) |
| HSV1 class | 0.48 | 1.07 | 0.45 | 0.653 | 1.62 (0.20 ~ 13.32) |  |  |  |  |  |
| Human adenovirus 2 class | -12.02 | 882.74 | -0.01 | 0.989 | 0.00 (0.00 ~ Inf) |  |  |  |  |  |
| Human adenovirus 3 class | -14.03 | 979.61 | -0.01 | 0.989 | 0.00 (0.00 ~ Inf) |  |  |  |  |  |
| Human adenovirus 5 class | -13.02 | 1029.12 | -0.01 | 0.990 | 0.00 (0.00 ~ Inf) |  |  |  |  |  |
| Human adenovirus 57 class | -12.02 | 882.74 | -0.01 | 0.989 | 0.00 (0.00 ~ Inf) |  |  |  |  |  |
| Human adenovirus 7 class | -12.02 | 882.74 | -0.01 | 0.989 | 0.00 (0.00 ~ Inf) |  |  |  |  |  |
| Human adenovirus B class | -13.02 | 1029.12 | -0.01 | 0.990 | 0.00 (0.00 ~ Inf) |  |  |  |  |  |
| Human adenovirus C class | -13.02 | 840.27 | -0.02 | 0.988 | 0.00 (0.00 ~ Inf) |  |  |  |  |  |
| Human bocavirus 1 class | 0.79 | 0.78 | 1.01 | 0.313 | 2.20 (0.47 ~ 10.23) |  |  |  |  |  |
| Human coronavirus 229E class | -12.02 | 882.74 | -0.01 | 0.989 | 0.00 (0.00 ~ Inf) |  |  |  |  |  |
| Human coronavirus HKU1 class | -13.02 | 727.70 | -0.02 | 0.986 | 0.00 (0.00 ~ Inf) |  |  |  |  |  |
| Human coronavirus OC43 class | -13.02 | 1029.12 | -0.01 | 0.990 | 0.00 (0.00 ~ Inf) |  |  |  |  |  |
| Human herpesvirus 4 class | -13.02 | 1029.12 | -0.01 | 0.990 | 0.00 (0.00 ~ Inf) |  |  |  |  |  |
| Human herpesvirus 5 class | 0.78 | 1.09 | 0.71 | 0.478 | 2.17 (0.25 ~ 18.51) |  |  |  |  |  |
| Human herpesvirus 6 class | -13.02 | 727.70 | -0.02 | 0.986 | 0.00 (0.00 ~ Inf) |  |  |  |  |  |
| Human herpesvirus 6B class | -14.02 | 1073.11 | -0.01 | 0.990 | 0.00 (0.00 ~ Inf) |  |  |  |  |  |
| Human herpesvirus 7 class | 0.16 | 1.06 | 0.15 | 0.881 | 1.17 (0.15 ~ 9.33) |  |  |  |  |  |
| Human parainfluenza virus 1 class | -13.02 | 727.70 | -0.02 | 0.986 | 0.00 (0.00 ~ Inf) |  |  |  |  |  |
| Human parainfluenza virus 3 class | -0.29 | 1.04 | -0.28 | 0.782 | 0.75 (0.10 ~ 5.78) |  |  |  |  |  |
| Human RSV A class | -14.03 | 979.61 | -0.01 | 0.989 | 0.00 (0.00 ~ Inf) |  |  |  |  |  |
| Human RSV B class | -14.03 | 799.85 | -0.02 | 0.986 | 0.00 (0.00 ~ Inf) |  |  |  |  |  |
| Influenza A H1N1 2009 class | -12.02 | 882.74 | -0.01 | 0.989 | 0.00 (0.00 ~ Inf) |  |  |  |  |  |
| Influenza A H3N2 class | -12.02 | 882.74 | -0.01 | 0.989 | 0.00 (0.00 ~ Inf) |  |  |  |  |  |
| Influenza B Victoria class | -14.02 | 1073.11 | -0.01 | 0.990 | 0.00 (0.00 ~ Inf) |  |  |  |  |  |
| Influenza C virus class | -13.02 | 1029.12 | -0.01 | 0.990 | 0.00 (0.00 ~ Inf) |  |  |  |  |  |
| Klebsiella aerogenes class | 2.60 | 1.01 | 2.56 | 0.010 | 13.50 (1.85 ~ 98.66) | 2.67 | 1.03 | 2.60 | 0.009 | 14.39 (1.93 ~ 107.40) |
| Klebsiella oxytoca class | -13.02 | 1029.12 | -0.01 | 0.990 | 0.00 (0.00 ~ Inf) |  |  |  |  |  |
| Klebsiella pneumoniae class | 0.16 | 0.76 | 0.21 | 0.830 | 1.18 (0.27 ~ 5.20) |  |  |  |  |  |
| Klebsiella variicola class | -12.02 | 882.74 | -0.01 | 0.989 | 0.00 (0.00 ~ Inf) |  |  |  |  |  |
| Legionella pneumophila class | -13.02 | 840.27 | -0.02 | 0.988 | 0.00 (0.00 ~ Inf) |  |  |  |  |  |
| Macrolide antibiotics class | -16.09 | 1072.32 | -0.02 | 0.988 | 0.00 (0.00 ~ Inf) |  |  |  |  |  |
| Measles virus class | -12.02 | 882.74 | -0.01 | 0.989 | 0.00 (0.00 ~ Inf) |  |  |  |  |  |
| Moraxella catarrhalis class | -0.39 | 0.49 | -0.78 | 0.434 | 0.68 (0.26 ~ 1.79) |  |  |  |  |  |
| MRSA class | -12.02 | 882.74 | -0.01 | 0.989 | 0.00 (0.00 ~ Inf) |  |  |  |  |  |
| MRSA resistance gene class | -13.02 | 840.27 | -0.02 | 0.988 | 0.00 (0.00 ~ Inf) |  |  |  |  |  |
| Mycoplasma pneumoniae class | -0.25 | 0.55 | -0.46 | 0.648 | 0.78 (0.27 ~ 2.27) |  |  |  |  |  |
| Neisseria meningitidis class | -12.02 | 882.74 | -0.01 | 0.989 | 0.00 (0.00 ~ Inf) |  |  |  |  |  |
| Parvimonas micra class | -13.02 | 1029.12 | -0.01 | 0.990 | 0.00 (0.00 ~ Inf) |  |  |  |  |  |
| Pneumocystis jirovecii class | 0.62 | 1.08 | 0.57 | 0.567 | 1.86 (0.22 ~ 15.50) |  |  |  |  |  |
| Pseudomonas aeruginosa class | 1.91 | 0.88 | 2.16 | 0.031 | 6.72 (1.19 ~ 37.95) | 1.31 | 1.10 | 1.19 | 0.234 | 3.71 (0.43 ~ 32.18) |
| Rhinovirus A class | -1.22 | 1.03 | -1.19 | 0.234 | 0.29 (0.04 ~ 2.20) |  |  |  |  |  |
| Rhinovirus B class | -14.03 | 799.85 | -0.02 | 0.986 | 0.00 (0.00 ~ Inf) |  |  |  |  |  |
| Rhinovirus C class | -15.06 | 824.92 | -0.02 | 0.985 | 0.00 (0.00 ~ Inf) |  |  |  |  |  |
| Rhinovirus class | -13.02 | 727.70 | -0.02 | 0.986 | 0.00 (0.00 ~ Inf) |  |  |  |  |  |
| SARS CoV 2 class | -13.02 | 840.27 | -0.02 | 0.988 | 0.00 (0.00 ~ Inf) |  |  |  |  |  |
| Staphylococcus aureus class | 0.20 | 0.50 | 0.39 | 0.694 | 1.22 (0.46 ~ 3.25) |  |  |  |  |  |
| Stenotrophomonas maltophilia class | 17.15 | 882.74 | 0.02 | 0.985 | 27937076.46 (0.00 ~ Inf) |  |  |  |  |  |
| Streptococcus agalactiae class | -12.02 | 882.74 | -0.01 | 0.989 | 0.00 (0.00 ~ Inf) |  |  |  |  |  |
| Streptococcus anginosus group class | 1.08 | 0.80 | 1.35 | 0.176 | 2.96 (0.62 ~ 14.20) |  |  |  |  |  |
| Streptococcus intermedius class | 0.70 | 0.51 | 1.38 | 0.169 | 2.02 (0.74 ~ 5.52) |  |  |  |  |  |
| Streptococcus mitis group class | -16.10 | 1031.32 | -0.02 | 0.988 | 0.00 (0.00 ~ Inf) |  |  |  |  |  |
| Streptococcus pneumoniae class | 0.15 | 0.36 | 0.41 | 0.685 | 1.16 (0.57 ~ 2.36) |  |  |  |  |  |
| Streptococcus pyogenes class | -13.02 | 1029.12 | -0.01 | 0.990 | 0.00 (0.00 ~ Inf) |  |  |  |  |  |
| Tropheryma whipplei class | 1.77 | 0.71 | 2.49 | 0.013 | 5.89 (1.46 ~ 23.77) | 1.64 | 0.77 | 2.14 | 0.033 | 5.16 (1.15 ~ 23.22) |
| Ureaplasma parvum class | -12.02 | 882.74 | -0.01 | 0.989 | 0.00 (0.00 ~ Inf) |  |  |  |  |  |
| Varicella zoster virus class | -12.02 | 882.74 | -0.01 | 0.989 | 0.00 (0.00 ~ Inf) |  |  |  |  |  |
| WU polyomavirus class | -13.02 | 727.70 | -0.02 | 0.986 | 0.00 (0.00 ~ Inf) |  |  |  |  |  |

Note: OR, Odd Ratio; CI: Confidence Interval; EBV, Epstein-Barr virus; HSV1, Herpes simplex virus type 1; MRSA, Methicillin-resistant Staphylococcus aureus; RSV, Respiratory Syncytial Virus; SARS-CoV-2, Severe Acute Respiratory Syndrome Coronavirus 2. Pathogens with P<0.1 in univariate logistic regression were enrolled in multivariate logistic regression. The threshold for statistical significance is P-values < 0.05.

Supplementary Table 11. Univariate and Multivariate Logistic Regression Estimating the Effect of Co-detected Pathogens Pathogens on Pneumonia on Imaging Risk

| Variables | β | S.E | Z | P-values | OR (95%CI) | β | S.E | Z | P-values | OR (95%CI) |
| --- | --- | --- | --- | --- | --- | --- | --- | --- | --- | --- |
| Acinetobacter baumannii class | 0.59 | 0.63 | 0.94 | 0.347 | 1.81 (0.53 ~ 6.23) |  |  |  |  |  |
| Acinetobacter calcoaceticus baumannii complex class | 12.29 | 535.41 | 0.02 | 0.982 | 218565.60 (0.00 ~ Inf) |  |  |  |  |  |
| Bordetella parapertussis class | -14.85 | 535.41 | -0.03 | 0.978 | 0.00 (0.00 ~ Inf) |  |  |  |  |  |
| Bordetella pertussis class | -0.37 | 0.60 | -0.61 | 0.540 | 0.69 (0.21 ~ 2.25) |  |  |  |  |  |
| Burkholderia cepacia complex class | -14.85 | 535.41 | -0.03 | 0.978 | 0.00 (0.00 ~ Inf) |  |  |  |  |  |
| Candida albicans class | -0.01 | 0.39 | -0.01 | 0.989 | 0.99 (0.46 ~ 2.15) |  |  |  |  |  |
| Candida krusei class | 13.30 | 624.19 | 0.02 | 0.983 | 595576.28 (0.00 ~ Inf) |  |  |  |  |  |
| Candida parapsilosis class | 0.82 | 1.07 | 0.77 | 0.444 | 2.26 (0.28 ~ 18.28) |  |  |  |  |  |
| Candida tropicalis class | -0.60 | 0.62 | -0.96 | 0.338 | 0.55 (0.16 ~ 1.86) |  |  |  |  |  |
| Coxsackievirus A10 class | 13.30 | 624.19 | 0.02 | 0.983 | 595576.28 (0.00 ~ Inf) |  |  |  |  |  |
| Coxsackievirus A16 class | 12.29 | 535.41 | 0.02 | 0.982 | 218565.60 (0.00 ~ Inf) |  |  |  |  |  |
| Coxsackievirus A6 class | 12.29 | 535.41 | 0.02 | 0.982 | 218565.60 (0.00 ~ Inf) |  |  |  |  |  |
| Cytomegalovirus class | -0.26 | 0.38 | -0.69 | 0.492 | 0.77 (0.36 ~ 1.63) |  |  |  |  |  |
| EBV class | -0.64 | 0.36 | -1.78 | 0.076 | 0.53 (0.26 ~ 1.07) | -0.65 | 0.37 | -1.78 | 0.075 | 0.52 (0.25 ~ 1.07) |
| Enterococcus faecium class | 12.29 | 535.41 | 0.02 | 0.982 | 218565.60 (0.00 ~ Inf) |  |  |  |  |  |
| Enterovirus A class | -1.28 | 1.42 | -0.90 | 0.367 | 0.28 (0.02 ~ 4.48) |  |  |  |  |  |
| Enterovirus B class | 12.29 | 535.41 | 0.02 | 0.982 | 218565.60 (0.00 ~ Inf) |  |  |  |  |  |
| Enterovirus D68 class | 13.30 | 624.19 | 0.02 | 0.983 | 595576.28 (0.00 ~ Inf) |  |  |  |  |  |
| Escherichia coli class | 14.31 | 514.56 | 0.03 | 0.978 | 1643048.33 (0.00 ~ Inf) |  |  |  |  |  |
| Fusobacterium nucleatum class | 0.34 | 0.25 | 1.33 | 0.184 | 1.40 (0.85 ~ 2.31) |  |  |  |  |  |
| Haemophilus haemolyticus class | 13.30 | 509.65 | 0.03 | 0.979 | 597036.02 (0.00 ~ Inf) |  |  |  |  |  |
| Haemophilus influenzae class | -0.03 | 0.21 | -0.15 | 0.884 | 0.97 (0.64 ~ 1.47) |  |  |  |  |  |
| HSV1 class | -1.07 | 0.68 | -1.58 | 0.114 | 0.34 (0.09 ~ 1.29) |  |  |  |  |  |
| Human adenovirus 2 class | 12.29 | 535.41 | 0.02 | 0.982 | 218565.60 (0.00 ~ Inf) |  |  |  |  |  |
| Human adenovirus 3 class | 14.31 | 594.16 | 0.02 | 0.981 | 1634934.52 (0.00 ~ Inf) |  |  |  |  |  |
| Human adenovirus 5 class | -1.28 | 1.42 | -0.90 | 0.367 | 0.28 (0.02 ~ 4.48) |  |  |  |  |  |
| Human adenovirus 57 class | 12.29 | 535.41 | 0.02 | 0.982 | 218565.60 (0.00 ~ Inf) |  |  |  |  |  |
| Human adenovirus 7 class | 12.29 | 535.41 | 0.02 | 0.982 | 218565.60 (0.00 ~ Inf) |  |  |  |  |  |
| Human adenovirus B class | 13.30 | 624.19 | 0.02 | 0.983 | 595576.28 (0.00 ~ Inf) |  |  |  |  |  |
| Human adenovirus C class | -0.58 | 1.23 | -0.48 | 0.635 | 0.56 (0.05 ~ 6.20) |  |  |  |  |  |
| Human bocavirus 1 class | 0.53 | 0.77 | 0.69 | 0.492 | 1.70 (0.37 ~ 7.70) |  |  |  |  |  |
| Human coronavirus 229E class | 12.29 | 535.41 | 0.02 | 0.982 | 218565.60 (0.00 ~ Inf) |  |  |  |  |  |
| Human coronavirus HKU1 class | -0.18 | 1.16 | -0.15 | 0.879 | 0.84 (0.09 ~ 8.14) |  |  |  |  |  |
| Human coronavirus OC43 class | -1.28 | 1.42 | -0.90 | 0.367 | 0.28 (0.02 ~ 4.48) |  |  |  |  |  |
| Human herpesvirus 4 class | 13.30 | 624.19 | 0.02 | 0.983 | 595576.28 (0.00 ~ Inf) |  |  |  |  |  |
| Human herpesvirus 5 class | 14.31 | 550.09 | 0.03 | 0.979 | 1638981.38 (0.00 ~ Inf) |  |  |  |  |  |
| Human herpesvirus 6 class | 14.30 | 727.70 | 0.02 | 0.984 | 1626900.44 (0.00 ~ Inf) |  |  |  |  |  |
| Human herpesvirus 6B class | 14.30 | 650.87 | 0.02 | 0.982 | 1630907.58 (0.00 ~ Inf) |  |  |  |  |  |
| Human herpesvirus 7 class | 0.34 | 0.78 | 0.44 | 0.661 | 1.41 (0.30 ~ 6.52) |  |  |  |  |  |
| Human parainfluenza virus 1 class | -0.18 | 1.16 | -0.15 | 0.879 | 0.84 (0.09 ~ 8.14) |  |  |  |  |  |
| Human parainfluenza virus 3 class | 0.35 | 0.64 | 0.54 | 0.589 | 1.41 (0.40 ~ 4.97) |  |  |  |  |  |
| Human RSV A class | -2.00 | 0.87 | -2.29 | 0.022 | 0.14 (0.02 ~ 0.75) | -2.37 | 0.92 | -2.57 | 0.010 | 0.09 (0.02 ~ 0.57) |
| Human RSV B class | -0.02 | 0.81 | -0.03 | 0.979 | 0.98 (0.20 ~ 4.78) |  |  |  |  |  |
| Influenza A H1N1 2009 class | 12.29 | 535.41 | 0.02 | 0.982 | 218565.60 (0.00 ~ Inf) |  |  |  |  |  |
| Influenza A H3N2 class | -14.85 | 535.41 | -0.03 | 0.978 | 0.00 (0.00 ~ Inf) |  |  |  |  |  |
| Influenza B Victoria class | 0.11 | 1.12 | 0.10 | 0.919 | 1.12 (0.12 ~ 10.12) |  |  |  |  |  |
| Influenza C virus class | -15.86 | 624.19 | -0.03 | 0.980 | 0.00 (0.00 ~ Inf) |  |  |  |  |  |
| Klebsiella aerogenes class | 14.30 | 727.70 | 0.02 | 0.984 | 1626900.44 (0.00 ~ Inf) |  |  |  |  |  |
| Klebsiella oxytoca class | -1.28 | 1.42 | -0.90 | 0.367 | 0.28 (0.02 ~ 4.48) |  |  |  |  |  |
| Klebsiella pneumoniae class | 0.35 | 0.56 | 0.63 | 0.530 | 1.42 (0.48 ~ 4.24) |  |  |  |  |  |
| Klebsiella variicola class | 12.29 | 535.41 | 0.02 | 0.982 | 218565.60 (0.00 ~ Inf) |  |  |  |  |  |
| Legionella pneumophila class | -15.87 | 509.65 | -0.03 | 0.975 | 0.00 (0.00 ~ Inf) |  |  |  |  |  |
| Macrolide antibiotics class | 0.39 | 0.46 | 0.86 | 0.391 | 1.48 (0.60 ~ 3.64) |  |  |  |  |  |
| Measles virus class | 12.29 | 535.41 | 0.02 | 0.982 | 218565.60 (0.00 ~ Inf) |  |  |  |  |  |
| Moraxella catarrhalis class | -0.32 | 0.26 | -1.22 | 0.222 | 0.73 (0.43 ~ 1.21) |  |  |  |  |  |
| MRSA class | 12.29 | 535.41 | 0.02 | 0.982 | 218565.60 (0.00 ~ Inf) |  |  |  |  |  |
| MRSA resistance gene class | 13.30 | 509.65 | 0.03 | 0.979 | 597036.02 (0.00 ~ Inf) |  |  |  |  |  |
| Mycoplasma pneumoniae class | 0.68 | 0.37 | 1.82 | 0.069 | 1.97 (0.95 ~ 4.11) | 0.81 | 0.40 | 2.02 | 0.044 | 2.25 (1.02 ~ 4.93) |
| Neisseria meningitidis class | 12.29 | 535.41 | 0.02 | 0.982 | 218565.60 (0.00 ~ Inf) |  |  |  |  |  |
| Parvimonas micra class | 13.30 | 624.19 | 0.02 | 0.983 | 595576.28 (0.00 ~ Inf) |  |  |  |  |  |
| Pneumocystis jirovecii class | 14.31 | 514.56 | 0.03 | 0.978 | 1643048.33 (0.00 ~ Inf) |  |  |  |  |  |
| Pseudomonas aeruginosa class | 0.34 | 1.10 | 0.31 | 0.758 | 1.40 (0.16 ~ 12.14) |  |  |  |  |  |
| Rhinovirus A class | 0.78 | 0.49 | 1.59 | 0.111 | 2.18 (0.84 ~ 5.67) |  |  |  |  |  |
| Rhinovirus B class | -0.02 | 0.81 | -0.03 | 0.979 | 0.98 (0.20 ~ 4.78) |  |  |  |  |  |
| Rhinovirus C class | 0.01 | 0.52 | 0.01 | 0.988 | 1.01 (0.37 ~ 2.78) |  |  |  |  |  |
| Rhinovirus class | 14.30 | 727.70 | 0.02 | 0.984 | 1626900.44 (0.00 ~ Inf) |  |  |  |  |  |
| SARS CoV 2 class | 13.30 | 509.65 | 0.03 | 0.979 | 597036.02 (0.00 ~ Inf) |  |  |  |  |  |
| Staphylococcus aureus class | 0.35 | 0.36 | 0.97 | 0.335 | 1.42 (0.70 ~ 2.90) |  |  |  |  |  |
| Stenotrophomonas maltophilia class | 12.29 | 535.41 | 0.02 | 0.982 | 218565.60 (0.00 ~ Inf) |  |  |  |  |  |
| Streptococcus agalactiae class | 12.29 | 535.41 | 0.02 | 0.982 | 218565.60 (0.00 ~ Inf) |  |  |  |  |  |
| Streptococcus anginosus group class | 0.24 | 0.79 | 0.30 | 0.766 | 1.26 (0.27 ~ 5.94) |  |  |  |  |  |
| Streptococcus intermedius class | 0.46 | 0.46 | 1.01 | 0.313 | 1.59 (0.65 ~ 3.88) |  |  |  |  |  |
| Streptococcus mitis group class | -0.59 | 0.36 | -1.67 | 0.094 | 0.55 (0.27 ~ 1.11) | -0.56 | 0.36 | -1.57 | 0.117 | 0.57 (0.28 ~ 1.15) |
| Streptococcus pneumoniae class | 0.06 | 0.23 | 0.24 | 0.813 | 1.06 (0.67 ~ 1.67) |  |  |  |  |  |
| Streptococcus pyogenes class | -1.28 | 1.42 | -0.90 | 0.367 | 0.28 (0.02 ~ 4.48) |  |  |  |  |  |
| Tropheryma whipplei class | 15.32 | 758.80 | 0.02 | 0.984 | 4488544.87 (0.00 ~ Inf) |  |  |  |  |  |
| Ureaplasma parvum class | 12.29 | 535.41 | 0.02 | 0.982 | 218565.60 (0.00 ~ Inf) |  |  |  |  |  |
| Varicella zoster virus class | 12.29 | 535.41 | 0.02 | 0.982 | 218565.60 (0.00 ~ Inf) |  |  |  |  |  |
| WU polyomavirus class | -0.18 | 1.16 | -0.15 | 0.879 | 0.84 (0.09 ~ 8.14) |  |  |  |  |  |

Note: OR, Odd Ratio; CI: Confidence Interval; EBV, Epstein-Barr virus; HSV1, Herpes simplex virus type 1; MRSA, Methicillin-resistant Staphylococcus aureus; RSV, Respiratory Syncytial Virus; SARS-CoV-2, Severe Acute Respiratory Syndrome Coronavirus 2. Pathogens with P<0.1 in univariate logistic regression were enrolled in multivariate logistic regression. The threshold for statistical significance is P-values < 0.05.
